# Supplementary material for: Synthesis of novel axially chiral Rh–NHC complexes derived from BINAM and application in the enantioselective hydrosilylation of methyl ketones
Source: Royal Society of Chemistry journal article supplement (doi:10.1039/b309185f), 2003-01-01
Supplement: b309185f.pdf [file b309185f.pdf]

## Supporting Information

### Synthesis of Novel Axially Chiral Rh-NHC Complexes Derived from BINAM and Application in the Enantioselective Hydrosilylation of Methyl Ketones\*\*

Wei-Liang Duan,<sup>b</sup> Min Shi,<sup>a\*</sup> Guo-Bin Rong<sup>b</sup>

<sup>a</sup>State Key Laboratory of Organometallic Chemistry,  
Shanghai Institute of Organic Chemistry, Chinese Academy of Sciences,  
354 Fenglin Road, Shanghai 200032 China, [mshi@pub.sioc.ac.cn](mailto:mshi@pub.sioc.ac.cn)  
Fax: 86-21-64166128

<sup>b</sup>School of Chemistry & Pharmaceutics  
East China University of Science and Technology  
130 MeiLong Road, Shanghai 200237 China

**General Remarks.** <sup>1</sup>H NMR spectra were recorded on a Bruker AM-300 spectrometer for solution in CDCl<sub>3</sub> with tetramethylsilane (TMS) as an internal standard; *J*-values are in Hz. Mass spectra were recorded with a HP-5989 instrument. Optical rotations were determined at 589 nm (sodium D line) by using a Perkin-Elmer-241 MC digital polarimeter; [α]<sub>D</sub>-values are given in unit of 10<sup>-1</sup> deg cm<sup>2</sup> g<sup>-1</sup>. THF and toluene were distilled from Na under Ar atmosphere. All of the solid compounds reported in this paper gave satisfactory CHN microanalyses with a Carlo-Erba 1106 analyzer. [RhCl(COD)]<sub>2</sub> was prepared according to the literature.<sup>1</sup> Commercially obtained reagents were used without further purification. All reactions were monitored by TLC with Huanghai GF<sub>254</sub> silica gel coated plates. Flash column chromatography was carried out using 300-400 mesh silica gel at increased pressure. Enantiomeric ratios were determined by chiral GC or HPLC analysis. The absolute configuration was assigned by comparison the optical rotation with those reported date. Racemic products were synthesized from the reduction of corresponding ketones in THF with LiAlH<sub>4</sub> or NaBH<sub>4</sub>.

1) G. Giordano, R. H. Crabtree, *Inorg. Synth.* **1988**, 28, 88.

### Synthesis of (S)-(+)-*N*<sup>2</sup>, *N*<sup>2'</sup>-bis(2-nitrophenyl)-1,1'-binaphthalenyl-2,2'-diamine 2.

Under argon atmosphere, a mixture of (S)-1,1'-binaphthalenyl-2,2'-diamine **1** (142 mg, 0.50 mmol), 2-bromo-nitrobenzene (303 mg, 1.5 mmol), Pd<sub>2</sub>(dba)<sub>3</sub> (12 mg, 0.0125 mmol), DPE-phos (20 mg, 0.0375 mmol), and Cs<sub>2</sub>CO<sub>3</sub> (520 mg, 1.6 mmol) were stirred in anhydrous toluene (4.0 mL) at 80 °C for 48 h. After the reaction mixture was cooled to room temperature, the reaction was quenched by addition of 10 mL H<sub>2</sub>O. The organic compound was extracted with EtOAc (2 x 20 mL) and dried over anhydrous Na<sub>2</sub>SO<sub>4</sub>. The solvent was removed under reduced pressure and the residue was purified by a silica gel flash column chromatography (eluent: hexane/ethyl acetate= 20/1) to remove excess raw material, and then with eluent: hexane/ethyl acetate= 4/1 to give **2** as a red solid; Yield: 263 mg (100%). [α]<sub>D</sub><sup>20</sup> = 522.4 (c 0.33, CHCl<sub>3</sub>); IR (KBr) ν 3317, 1613, 1498, 1244, 736 cm<sup>-1</sup>; <sup>1</sup>H NMR (300 MHz, CDCl<sub>3</sub>, TMS) δ 6.58-6.64 (m, 2H, ArH), 7.10-7.30 (m, 6H, ArH), 7.31-7.37 (m, 2H, ArH), 7.46-7.51 (m, 2H, ArH), 7.68 (d, *J* = 8.7 Hz, 2H, ArH), 7.92-7.98 (m, 4H, ArH), 8.02 (d, *J* = 9.0 Hz, 2H, ArH), 9.04 (s, 2H, NH); <sup>13</sup>C NMR (75 MHz, CDCl<sub>3</sub>, TMS) δ 115.65, 117.74, 122.09, 124.82, 125.64, 125.74, 126.16, 127.48, 128.44, 129.71, 131.31, 133.30, 133.43, 135.16, 135.37, 141.49; MS (CI) *m/e* 527 (M<sup>+</sup>+1, 100), 480 (M<sup>+</sup>-46, 9.14), 389 (M<sup>+</sup>-137, 8.64), 341 (M<sup>+</sup>-185, 20.95); Anal. Calcd. for C<sub>32</sub>H<sub>22</sub>N<sub>4</sub>O<sub>4</sub> requires: C 72.99, H 4.21, N 10.64. Found: C 72.89, H 4.07, N 10.49%.

### Synthesis of (S)-(-)-*N*<sup>2</sup>, *N*<sup>2'</sup>-bis(2-aminophenyl)-1,1'-binaphthalenyl-2,2'-diamine 3.

A mixture of **2** (144 mg, 0.25 mmol), 10% Pd-C (15 mg) in mixed solution of EtOAc (15 mL) and EtOH (45 mL) were stirred under H<sub>2</sub> atmosphere (1.0 atm) at 60 °C for 24 h. After cooling to room temperature, Pd-C was removed by filtration. The solvent was evaporated under reduced pressure. The residue was purified by a silica gel flash column chromatography (eluent: hexane/ethyl acetate, 2/1–1/1) to give **3** as a white solid; Yield: 107 mg (92%). [α]<sub>D</sub><sup>20</sup> = -199.0 (c 0.52, CHCl<sub>3</sub>); IR (KBr) ν 3368, 1618, 1593, 1500, 1299, 817, 745 cm<sup>-1</sup>; <sup>1</sup>H NMR (300 MHz, CDCl<sub>3</sub>, TMS) δ 3.69 (br, 4H, NH<sub>2</sub>), 5.15 (br, 2H, NH), 6.67-6.74 (m, 4H, ArH), 6.98-7.05 (m, 4H, ArH), 7.15 (d, *J* = 8.7 Hz, 2H, ArH), 7.24-7.29 (m, 6H, ArH), 7.80-7.83 (m, 4H, ArH), <sup>13</sup>C NMR (75 MHz, CDCl<sub>3</sub>, TMS) δ 113.33, 115.78, 116.17, 118.77, 122.81, 123.68, 126.62, 126.85, 127.04, 127.45, 128.37, 128.70, 129.69, 133.76, 142.66, 143.06; MS (EI) *m/e* 466 (M<sup>+</sup>, 100), 359 (M<sup>+</sup>-107, 34.75), 266 (M<sup>+</sup>-200, 36.18); Anal. Calcd. for C<sub>32</sub>H<sub>26</sub>N<sub>4</sub> requires: C 82.38, H 5.62, N 12.01. Found: C 81.98, H 5.65, N 11.97%.

### Synthesis of (S)-(-)-1,1'-(1,1'-binaphthanelyl)dibenzimidazole 4.

The compound **3** (233 mg, 0.50 mmol) and triethyl orthoformate [HC(OC<sub>2</sub>H<sub>5</sub>)<sub>3</sub>] (5.0 mL)

containing a little TsOH were heated at 100 °C for 24 h. After the excess amount of triethyl orthoformate was removed under reduced pressure, the residue was purified by a silica gel flash column chromatography (eluent: hexane/ethyl acetate, 2/3) to give **4** as a white solid; Yield: 221 mg (91%).  $[\alpha]_D^{20} = -490.10$  (c 0.52, CHCl<sub>3</sub>); IR (KBr)  $\nu$  3057, 1612, 1490, 1232, 820, 734 cm<sup>-1</sup>; <sup>1</sup>H NMR (300 MHz, CDCl<sub>3</sub>, TMS)  $\delta$  6.10 (d, 2H,  $J = 8.4$  Hz, ArH), 6.40-6.52 (m, 2H, ArH), 6.93-6.99 (m, 2H, ArH), 6.99 (s, 2H, NCHN), 7.44 (d,  $J = 8.7$  Hz, 2H, ArH), 7.48-7.57 (m, 6H, ArH), 7.64-7.69 (m, 2H, ArH), 8.07 (d,  $J = 8.4$  Hz, 4H, ArH); <sup>13</sup>C NMR (75 MHz, CDCl<sub>3</sub>, TMS)  $\delta$  108.67, 119.06, 122.06, 123.40, 123.63, 126.16, 126.96, 128.01, 128.18, 128.77, 130.69, 132.19, 132.38, 133.78, 134.38, 141.42, 142.13; MS (EI)  $m/e$  486 (M<sup>+</sup>, 100), 368 (M<sup>+</sup>-118, 78.13), 243 (M<sup>+</sup>-143, 20.75); Anal. Calcd. for C<sub>34</sub>H<sub>22</sub>N<sub>4</sub> requires: C 83.93, H 4.56, N 11.51. Found: C 83.97, H 4.55, N 11.45%.

#### Synthesis of (S)-1,1'-(1,1'-binaphthyl)-3,3'-dimethyldibenzimidazolium diiodide **5**.

The compound **4** (97 mg, 0.20 mmol) and CH<sub>3</sub>I (0.24 mL, 4 mmol) in CH<sub>3</sub>CN (4.0 mL) were stirred under reflux for 5 h. After cooling to room temperature, volatiles were removed under reduced pressure and the obtained solid compound **5** was used for the next reaction without further purification. MS (ESI)  $m/e$  643.2 (M<sup>+</sup>-I), 258.1 (M-2I)/2.

#### Synthesis of Rh(I) complex **6** and Rh(III) complex **7**.

A mixture of **5** (154 mg, 0.20 mmol), [RhCl(COD)]<sub>2</sub> (48 mg, 0.10 mmol), NaOAc (132 mg, 0.80 mmol), and KI (66 mg, 0.40 mmol) was stirred in CH<sub>3</sub>CN (12 ml) under reflux for 24 h. After cooling, volatiles were removed under reduce pressure and the residue was purified by a silica gel flash column chromatography (eluent: hexane/ethyl acetate= 8/1) to give a [RhX(COD)]<sub>2</sub> fraction (X = Cl, I). The subsequent elution with hexane/ethyl acetate (6/1) gave a yellow solid Rh(I) complex **6**. The further elution with hexane/ ethyl acetate (1/1) gave a orange solid Rh(III) complex **7**.

**(S)-(-)-Diiodo-[1,1'-(1,1'-binaphthyl)-3,3'-dimethyldibenzimidazoline-2,2'-diylidene]bis-( $\eta^4$ -1,5-cyclooctadiene)dirhodium(I) **6**.** A crystal suitable for X-ray analysis was obtained by recrystallization from CH<sub>2</sub>Cl<sub>2</sub>.  $[\alpha]_D^{20} = -14.1$  (c 1.22, CHCl<sub>3</sub>); IR (KBr)  $\nu$  2847, 1601, 1483, 1333, 1218, 799, 738 cm<sup>-1</sup>; <sup>1</sup>H NMR (300 MHz, CDCl<sub>3</sub>, TMS)  $\delta$  1.43-1.55 (m, 4H, cod-CH<sub>2</sub>), 1.69-1.73 (m, 4H, cod-CH<sub>2</sub>), 1.83-1.87 (m, 2H, cod-CH<sub>2</sub>), 2.02-2.18 (m, 6H, cod-CH<sub>2</sub>), 3.09-3.11(m, 2H, cod-CH), 3.39-4.44 (m, 2H, cod-CH), 4.02-4.09 (m, 2H, cod-CH), 4.17 (s, 6H, CH<sub>3</sub>), 5.16-5.20 (m, 2H, cod-CH), 6.59-6.65 (m, 4H, ArH), 6.76-6.81 (m, 2H, ArH), 6.88 (d,  $J = 9.0$  Hz, 2H, ArH), 7.41-7.52 (m, 4H, ArH), 7.60-7.67 (m, 4H, ArH), 7.97 (d,  $J = 8.7$  Hz, 2H, ArH), 8.03 (d,  $J = 7.8$

Hz, 2H, ArH);  $^{13}\text{C}$  NMR (75 MHz,  $\text{CDCl}_3$ , TMS)  $\delta$  28.86, 29.63, 31.62, 32.70, 36.50, 70.37 (d,  $^1J(^{103}\text{Rh},\text{C}) = 13.4$  Hz, cod-CH), 71.88 (d,  $^1J(^{103}\text{Rh},\text{C}) = 14.8$  Hz, cod-CH), 96.14 (d,  $^1J(^{103}\text{Rh},\text{C}) = 6.1$  Hz, cod-CH), 98.33 (d,  $^1J(^{103}\text{Rh},\text{C}) = 7.1$  Hz, cod-CH), 107.90, 111.89, 121.16, 122.67, 126.39, 126.82, 127.29, 128.66, 129.11, 130.73, 131.64, 133.85, 134.12, 136.11, 137.01, 138.02, 196.35 (d,  $^1J(^{103}\text{Rh},\text{C}) = 49.1$  Hz,  $\text{CN}_2$ ); MS (ESI)  $m/e$  1063.1 ( $\text{M}^+$ -I); Anal. Calcd. for  $\text{C}_{52}\text{H}_{50}\text{I}_2\text{N}_4\text{Rh}_2 \cdot \text{H}_2\text{O}$  requires: C 51.68, H 4.34, N 4.64. Found: C 51.84, H 4.62, N 4.54%.

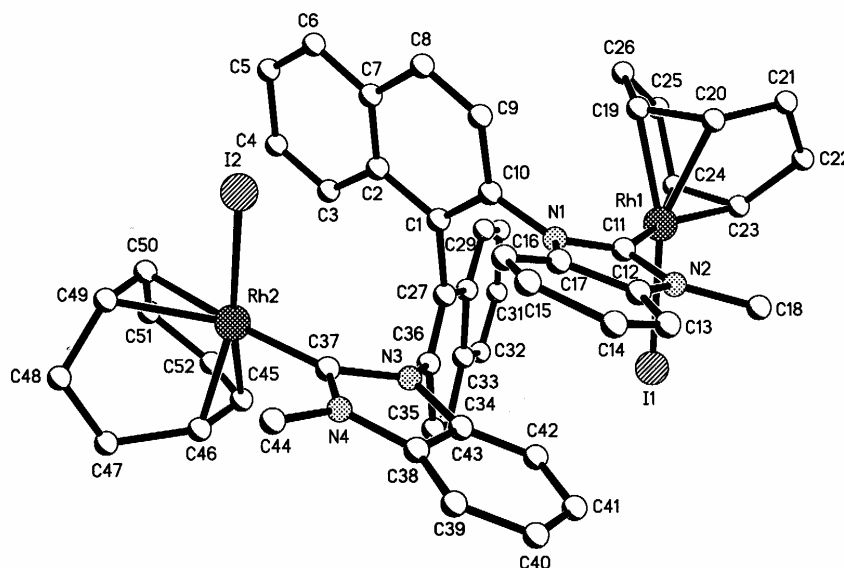

Figure 1: The ORTEP draw of Rh(I)-NHC complex **6**.

Selected bond lengths and angles: Rh-C(carbene) 2.059(12) and 1.924(19) Å,  
I1-Rh1-C11(carbene) 90.1(4)°.

The crystal data for Rh(I)-NHC complex **6**: empirical formula:  $\text{C}_{52}\text{H}_{50}\text{N}_4\text{I}_2\text{Rh}_2$ , formula weight: 1190.58, temperature: 293(2) K, crystal system, space group: Orthorhombic,  $\text{P}2(1)2(1)2(1)$ , unit cell dimensions:  $a = 12.1794(19)\text{Å}$ ,  $b = 19.027(3)\text{Å}$ ,  $c = 20.291(3)\text{Å}$ ,  $\alpha = 90^\circ$ ,  $\beta = 90^\circ$ ,  $\gamma = 90^\circ$ ,  $V = 4702.0(13)\text{Å}^3$ ,  $Z_{\text{value}} = 4$ ,  $D_{\text{calc}} = 1.682 \text{ g/cm}^3$ ,  $F_{000} = 2344$ , Crystal size: 0.432 x 0.201 x 0.126 mm, Data/restraints/parameters = 8726/0/544, Final R indices [ $I > 2\sigma(I)$ ]:  $R1 = 0.0651$ ,  $wR2 = 0.1366$ , R indices (all data):  $R1 = 0.1070$ ;  $wR2 = 0.1508$ . Its crystal structure has been deposited at the Cambridge Crystallographic Data Center and has been allocated the deposition numbers: CCDC 209244.

**(S)-(+)-Diiodo-[1,1'-(1,1'-binaphthyl)-3,3'-dimethyldibenzimidazoline-2,2'-diylidene] acetato Rh(III) 7**. Yield: 47 mg (25%). A crystal suitable for X-ray analysis was obtained by recrystallization from hexane/THF (1/1).  $[\alpha]_{\text{D}}^{20} = 8$  (c 1.03,  $\text{CHCl}_3$ ); IR (KBr)  $\nu$  3057, 1591, 1464,

1333, 1088, 739, 689  $\text{cm}^{-1}$ ;  $^1\text{H}$  NMR (300 MHz,  $\text{CDCl}_3$ , TMS)  $\delta$  4.28 (s, 6H,  $\text{CH}_3$ ), 6.70 (d,  $J = 8.1$  Hz, 2H, ArH), 6.90-7.12 (m, 10H, ArH), 7.28-7.33 (m, 2H, ArH), 7.74 (d,  $J = 8.1$  Hz, 2H, ArH), 7.94 (d,  $J = 8.7$  Hz, 2H, ArH), 8.36 (d,  $J = 9.0$  Hz, 2H, ArH);  $^{13}\text{C}$  NMR (75MHz,  $\text{CDCl}_3$ , TMS)  $\delta$  24.94, 38.04, 109.70, 111.32, 122.82, 123.32, 126.16, 126.62, 127.08, 127.71, 127.98, 129.36, 130.93, 132.81, 132.99, 134.37, 134.63, 136.25, 166.89 (d,  $^1J(^{103}\text{Rh},\text{C}) = 47.6$  Hz,  $\text{CN}_2$ ), 188.84; MS (ESI)  $m/e$  870.9 ( $\text{M}^+ - \text{OAc}$ ), 803.0 ( $\text{M}^+ - \text{I}$ ); Anal. Calcd. for  $\text{C}_{38}\text{H}_{29}\text{I}_2\text{N}_4\text{O}_2\text{Rh}$  requires: C 49.06, H 3.14, N 6.02. Found: C 49.42, H 3.23, N 5.70%.

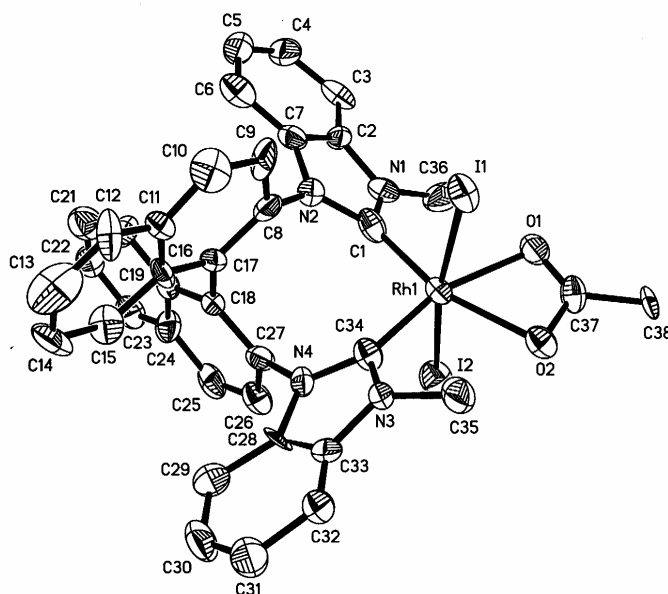

Figure 2: The ORTEP draw of Rh(III)-NHC complex 7.

Selected bond lengths and angles: Rh-C(carbene) 1.956(14) and 1.972(13) Å,  
Rh-O 2.175(9) and 2.174(9) Å, C1-Rh1-C34 98.1°.

The crystal data for Rh(III)-NHC complex 7: empirical formula:  $\text{C}_{40}\text{H}_{33}\text{N}_4\text{O}_{2.5}\text{I}_2\text{Rh}$ , formula weight: 966.41, temperature: 293(2) K, crystal system, space group: Orthorhombic,  $\text{P}2(1)2(1)2(1)$ , unit cell dimensions:  $a = 17.4433(9)\text{Å}$ ,  $b = 17.9331(9)\text{Å}$ ,  $c = 27.9530(14)\text{Å}$ ,  $\alpha = 90^\circ$ ,  $\beta = 90^\circ$ ,  $\gamma = 90^\circ$ ,  $V = 8744.0(8)\text{Å}^3$ ,  $Z_{\text{value}} = 8$ ,  $D_{\text{calc}} = 1.468 \text{ g/cm}^3$ ,  $F_{000} = 3776$ , Crystal size: 0.215 x 0.098 x 0.062 mm, Data/restraints/parameters = 20291/5/874, Final R indices [ $I > 2\sigma(I)$ ]:  $R_1 = 0.0663$ ,  $wR_2 = 0.1599$ , R indices (all data):  $R_1 = 0.1872$ ;  $wR_2 = 0.1940$ . Its crystal structure has been deposited at the Cambridge Crystallographic Data Center and has been allocated the deposition numbers: CCDC 209243.

### The Rh-catalyzed Enantioselective Hydrosilylation Reaction:

For an initial investigation of catalysts **6** and **7** (1.0 mol%) in the reduction of acetophenone with diphenylsilane disclosed that chiral Rh(III) complex **7** resulted in higher enantioselectivity (Table 1, entry 2), while chiral Rh(I) complex **6** gave poor result under the same conditions (Table 1, entry 1). The solvent effect has been examined as well. We found that THF is the best solvent among toluene, ether and dichloromethane (Table 1, entries 2-5). The reaction temperature did not significantly affect the enantiomeric excess (Table 1, entries 6-8). Using 2.0 mol% of catalyst **7**, the reaction can be completed within 24 h and the corresponding (*R*)-1-phenyl ethanol can be obtained in 98% ee and 87% yield (Table 1, entry 6).

Table 1. Axially chiral Rh complexes catalyzed enantioselective hydrosilylation of acetophenone.

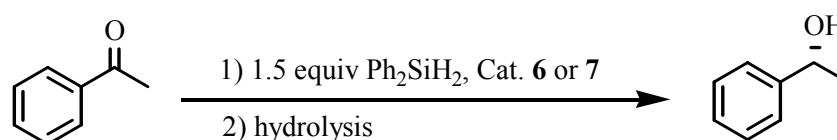

| Entry | Catalysts (mol%)  | Solvent                         | Temp./( <sup>o</sup> C) | Time/(h) | Yield/(%) <sup>a</sup> | ee/(%) <sup>b</sup> | Config. <sup>c</sup> |
|-------|-------------------|---------------------------------|-------------------------|----------|------------------------|---------------------|----------------------|
| 1     | <b>6</b> (1 mol%) | THF                             | 15                      | 48       | 77                     | 23                  | <i>R</i>             |
| 2     | <b>7</b> (1 mol%) | THF                             | 15                      | 48       | 77                     | 98                  | <i>R</i>             |
| 3     | <b>7</b> (1 mol%) | Toluene                         | 15                      | 48       | 74                     | 96                  | <i>R</i>             |
| 4     | <b>7</b> (1 mol%) | Et <sub>2</sub> O               | 15                      | 48       | 64                     | 96                  | <i>R</i>             |
| 5     | <b>7</b> (1 mol%) | CH <sub>2</sub> Cl <sub>2</sub> | 15                      | 48       | 33                     | 49                  | <i>R</i>             |
| 6     | <b>7</b> (2 mol%) | THF                             | 15                      | 24       | 87                     | 98                  | <i>R</i>             |
| 7     | <b>7</b> (2 mol%) | THF                             | 0                       | 24       | 66                     | 98                  | <i>R</i>             |
| 8     | <b>7</b> (2 mol%) | THF                             | 45                      | 24       | 82                     | 94                  | <i>R</i>             |

[a] Isolated yields. [b] Determined by chiral HPLC analysis. [c] Absolute stereochemistry determined by comparison of the sign of optical rotation to literature values.

Under the optimized reaction conditions, we subsequently examined the reduction of other aryl alkyl ketones. The results were summarized in Table 2. Various aryl alkyl ketones can be smoothly reduced to give the corresponding *sec*-alcohol in >92% ee and good yields under mild conditions (Table 2, entries 1-9). 2-Bromoacetophenone was also reduced in 97% ee and 92% yield under the same conditions (Table 2, entry 10).

Table 2. The chiral Rh complexes catalyzed enantioselective hydrosilylation of ketones

| $\text{R}^1\text{-C(=O)-R}^2 \xrightarrow[\text{2) hydrolysis}]{\text{1) 1.5 equiv Ph}_2\text{SiH}_2, \text{7 (2 mol\%), THF, 15 }^\circ\text{C, 24 h}}$ $\text{R}^1\text{-CH(OH)-R}^2$ |                                                                                     |                                     |                        |                     |
|-----------------------------------------------------------------------------------------------------------------------------------------------------------------------------------------|-------------------------------------------------------------------------------------|-------------------------------------|------------------------|---------------------|
| $\mathbf{8a-j}$                                                                                                                                                                         |                                                                                     | $(\mathbf{R})\text{-}\mathbf{9a-j}$ |                        |                     |
| Entry                                                                                                                                                                                   | Substrates                                                                          | No.                                 | Yield (%) <sup>a</sup> | ee (%) <sup>b</sup> |
|                                                                                                                                                                                         |                                                                                     | $\mathbf{9}$                        |                        |                     |
| 1                                                                                                                                                                                       | 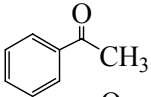   | <b>a</b>                            | 87                     | 98                  |
| 2                                                                                                                                                                                       |    | <b>b</b>                            | 91                     | 96                  |
| 3                                                                                                                                                                                       |    | <b>c</b>                            | 88                     | 95                  |
| 4                                                                                                                                                                                       |    | <b>d</b>                            | 86                     | 95                  |
| 5                                                                                                                                                                                       |   | <b>e</b>                            | 93                     | 98                  |
| 6                                                                                                                                                                                       |  | <b>f</b>                            | 96                     | 92                  |
| 7                                                                                                                                                                                       |  | <b>g</b>                            | 93                     | 98                  |
| 8                                                                                                                                                                                       |  | <b>h</b>                            | 82                     | 98                  |
| 9                                                                                                                                                                                       |  | <b>i</b>                            | 85                     | 92                  |
| 10                                                                                                                                                                                      |  | <b>j</b>                            | 92                     | 97                  |

[a] Isolated yields; [b] Determined by chiral HPLC.

For more challenging substrates such as dialkyl ketones, adamantyl methyl ketone **8k** was reduced in 96% ee and 96% yield under the same mild conditions (Table 3, entry 1). Other dialkyl

ketones **8l** and **8m** also can be reduced in good enantiomeric excesses and yields under the same conditions (Table 3, entries 2 and 3).

Table 3. The chiral Rh complexes catalyzed enantioselective hydrosilylation of aliphatic ketones

| Entry | Substrates                                                                         | No.      | Yield (%) <sup>a</sup> |                 | ee (%) <sup>b</sup> |  |
|-------|------------------------------------------------------------------------------------|----------|------------------------|-----------------|---------------------|--|
|       |                                                                                    |          | <b>9</b>               | <b>9</b>        |                     |  |
| 1     | 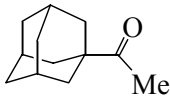  | <b>k</b> | 96                     | 96 <sup>c</sup> |                     |  |
| 2     |   | <b>l</b> | 87                     | 71              |                     |  |
| 3     |  | <b>m</b> | 86                     | 67 <sup>d</sup> |                     |  |

[a] Isolated yields. [b] Determined by chiral HPLC or GC. [c] Determined by chiral HPLC analysis of its *N*-phenyl carbamate derivative. [d] Determined by chiral GC analysis of its acetate derivative.

### General Procedure for the Rh-catalyzed Enantioselective Hydrosilylation Reaction:

Under an Ar atmosphere, the ketones (0.5 mmol) and PhSiH<sub>2</sub> (138 mg, 0.75 mmol) were added to a solution of the Rh complex (0.01 mmol) in 2 mL of anhydrous THF. The reaction mixture was stirred at reaction temperature. The reaction was quenched by addition of H<sub>2</sub>O (1 mL) and 0.5 N HCl (0.5 mL). The resulting aqueous solution was stirred for 0.5 h at room temperature and extracted with Et<sub>2</sub>O (2 x 10 mL) and dried over anhydrous Na<sub>2</sub>SO<sub>4</sub>. The solvent was removed under reduced pressure and the residue was purified by a silica gel flash column chromatography (eluent: pentane/Et<sub>2</sub>O= 10:1 – 4:1) to give the corresponding *sec*-alcohols. The enantiomeric excess of the obtained alcohols was determined by chiral HPLC or GC.

**(R)-1-Phenylethanol (9a):** Yield: 87% (53 mg). <sup>1</sup>H NMR (300 MHz, CDCl<sub>3</sub>, TMS) δ 1.50 (d, *J* = 6.6 Hz, 3H, CH<sub>3</sub>), 1.95 (br, 1H, OH), 4.89 (q, *J* = 6.6 Hz, 1H, CH), 7.22-7.40 (m, 5H, ArH); [α]<sub>D</sub><sup>20</sup> = 47.4 (c 2.60, CHCl<sub>3</sub>) for 98% ee; Chiralcel OJ, hexane/*i*-PrOH = 95/5, 0.7 mL/min, 254 nm, *t*<sub>S</sub> = 19.457 min, *t*<sub>R</sub> = 21.737 min.

**(R)-1-(Naphthalen-2-yl)ethanol (9b):** Yield: 91% (78 mg). <sup>1</sup>H NMR (300 MHz, CDCl<sub>3</sub>, TMS) δ



1.55 (d,  $J = 6.6$  Hz, 3H, CH<sub>3</sub>), 2.10 (br, 1H, OH), 5.02 (q,  $J = 6.6$  Hz, 1H, CH), 7.40-7.55 (m, 3H, ArH), 7.77-7.86 (m, 4H, ArH);  $[\alpha]_{\text{D}}^{20} = 34.95$  (c 3.85, EtOH) for 96% ee; Chiralcel OJ, hexane/*i*-PrOH = 95/5, 0.7 mL/min, 254 nm,  $t_{\text{S}} = 23.031$  min,  $t_{\text{R}} = 29.146$  min.

**(R)-1-(4-Bromophenyl)ethanol (9c)**: Yield: 88% (89 mg). <sup>1</sup>H NMR (300 MHz, CDCl<sub>3</sub>, TMS)  $\delta$  1.45 (d,  $J = 6.3$  Hz, 3H, CH<sub>3</sub>), 2.17 (br, 1H, OH), 4.82 (q,  $J = 6.3$  Hz, 1H, CH), 7.20-7.27 (m, 2H, ArH); 7.42-7.50 (m, 2H, ArH);  $[\alpha]_{\text{D}}^{20} = 45.3$  (c 1.0, CHCl<sub>3</sub>) for 95% ee; Chiralcel OJ, hexane/*i*-PrOH = 95/5, 0.7 mL/min, 254 nm,  $t_{\text{S}} = 18.579$  min,  $t_{\text{R}} = 20.060$  min.

**(R)-1-(4-Fluorophenyl)ethanol (9d)**: Yield: 86% (61 mg). <sup>1</sup>H NMR (300 MHz, CDCl<sub>3</sub>, TMS)  $\delta$  1.48 (d,  $J = 6.3$  Hz, 3H, CH<sub>3</sub>), 1.90 (br, 1H, OH), 4.88 (q,  $J = 6.3$  Hz, 1H, CH), 6.99-7.06 (m, 2H, ArH), 7.30-7.37 (m, 2H, ArH);  $[\alpha]_{\text{D}}^{20} = 34.0$  (c 1.65, CHCl<sub>3</sub>) for 95% ee; Chiralpak AS, hexane/*i*-PrOH = 95/5, 0.7 mL/min, 254 nm,  $t_{\text{R}} = 9.580$  min,  $t_{\text{S}} = 10.607$  min.

**(R)-1-(4-Methylphenyl)ethanol (9e)**: Yield: 93% (63 mg). <sup>1</sup>H NMR (300 MHz, CDCl<sub>3</sub>, TMS)  $\delta$  1.45 (d,  $J = 6.6$  Hz, 3H, CH<sub>3</sub>), 2.17 (br, 1H, OH), 2.33 (s, 3H, CH<sub>3</sub>), 4.81 (q,  $J = 6.6$  Hz, 1H, CH), 7.12-7.19 (m, 2H, ArH), 7.20-7.28 (m, 2H, ArH);  $[\alpha]_{\text{D}}^{20} = 46.8$  (c 2.9, CHCl<sub>3</sub>) for 98% ee; Chiralcel OJ, hexane/*i*-PrOH = 95/5, 0.7 mL/min, 254 nm,  $t_{\text{S}} = 23.500$  min,  $t_{\text{R}} = 26.473$  min.

**(R)-1-(4-Methoxyphenyl)ethanol (9f)**: Yield: 96% (73 mg). <sup>1</sup>H NMR (300 MHz, CDCl<sub>3</sub>, TMS)  $\delta$  1.44 (d,  $J = 6.3$  Hz, 3H, CH<sub>3</sub>), 2.76 (br, 1H, OH), 3.77 (s, 3H, CH<sub>3</sub>), 4.78 (q,  $J = 6.3$  Hz, 1H, CH), 6.83-6.91 (d,  $J = 8.3$  Hz, 2H, ArH), 7.22-7.31 (d,  $J = 8.3$  Hz, 2H, ArH);  $[\alpha]_{\text{D}}^{20} = 44.87$  (c 3.2, CHCl<sub>3</sub>) for 92% ee; Chiralpak AS, hexane/*i*-PrOH = 90/10, 0.7 mL/min,  $t_{\text{R}} = 14.885$  min,  $t_{\text{S}} = 18.491$  min □

**(R)-1-(3-Bromophenyl)ethanol (9g)**: Yield: 93% (94 mg). <sup>1</sup>H NMR (300 MHz, CDCl<sub>3</sub>, TMS)  $\delta$  1.50 (d,  $J = 6.6$  Hz, 3H, CH<sub>3</sub>), 2.12 (br, 1H, OH), 4.96 (q,  $J = 6.6$  Hz, 1H, CH), 7.44-7.57 (m, 3H, ArH); 7.65 (s, 1H, ArH);  $[\alpha]_{\text{D}}^{20} = 27.5$  (c 2.2, CH<sub>3</sub>OH) for 98% ee; Chiralcel OJ, hexane/*i*-PrOH = 95/5, 0.7 mL/min, 254 nm,  $t_{\text{S}} = 22.192$  min,  $t_{\text{R}} = 25.838$  min.

**(R)-1-(3-Trifluoromethylphenyl)ethanol (9h)**: Yield: 82% (78 mg). <sup>1</sup>H NMR (300 MHz, CDCl<sub>3</sub>, TMS)  $\delta$  1.50 (d,  $J = 6.6$  Hz, 3H, CH<sub>3</sub>), 1.89 (br, 1H, OH), 4.87 (q,  $J = 6.6$  Hz, 1H, CH), 7.19-7.38 (m, 2H, ArH), 7.38-7.52 (m, 1H, ArH), 7.53-7.55 (m, 1H, ArH);  $[\alpha]_{\text{D}}^{20} = 25.4$  (c 1.35, CH<sub>3</sub>OH)

for 98% ee; Chiralcel OJ, hexane/*i*-PrOH = 100/1, 0.7 mL/min, 254 nm,  $t_S = 27.539$  min,  $t_R = 33.094$  min.

**(R)-1-(2-Methylphenyl)ethanol (9i)**: Yield: 85% (58 mg).  $^1\text{H NMR}$  (300 MHz,  $\text{CDCl}_3$ , TMS)  $\delta$  1.47 (d,  $J = 6.3$  Hz, 3H,  $\text{CH}_3$ ), 1.76 (br, 1H, OH), 2.35 (s, 3H,  $\text{CH}_3$ ), 5.14 (q,  $J = 6.6$  Hz, 1H, CH), 7.12-7.26 (m, 3H, ArH), 7.52 (d,  $J = 7.2$  Hz, 1H, ArH);  $[\alpha]_D^{20} = 54.1$  (c 1.6, EtOH) for 92% ee; Chiralpak AD, hexane/*i*-PrOH = 95/5, 0.7 mL/min, 254 nm,  $t_R = 10.837$  min,  $t_S = 12.083$  min.

**(R)-2-Bromo-1-phenylethanol (9j)**: Yield: 92% (93 mg).  $^1\text{H NMR}$  (300 MHz,  $\text{CDCl}_3$ , TMS)  $\delta$  2.69 (d,  $J = 3.6$  Hz, 1H, OH), 3.54 (dd,  $J_1 = 8.7$  Hz,  $J_2 = 10.5$  Hz, 1H,  $\text{CH}_2\text{Br}$ ), 3.64 (dd,  $J_1 = 3.3$  Hz,  $J_2 = 10.5$  Hz, 1H,  $\text{CH}_2\text{Br}$ ), 4.92 (dt,  $J_1 = 3.3$  Hz,  $J_2 = 8.7$  Hz, 1H, CH), 7.33-7.40 (m, 5H, ArH);  $[\alpha]_D^{20} = 48.4$  (c 2.6,  $\text{CHCl}_3$ ) for 97% ee; Chiralcel OJ, hexane/*i*-PrOH = 95/5, 0.7 mL/min, 254 nm,  $t_S = 28.360$  min,  $t_R = 30.360$  min.

**(R)-1-(Adamantly)ethanol (9k)**: Yield: 96% (85 mg).  $^1\text{H NMR}$  (300 MHz,  $\text{CDCl}_3$ , TMS)  $\delta$  1.10 (d,  $J = 6.3$  Hz, 3H,  $\text{CH}_3$ ), 1.25 (br, 1H, OH), 1.44-1.74 (m, 12H), 1.95-2.02 (m, 3H), 3.29 (q,  $J = 6.3$  Hz, 1H, CH);  $[\alpha]_D^{20} = 1.0$  (c 2.0,  $\text{CHCl}_3$ ) for 96% ee;

**Derivation with phenyl isocyanate**: the alcohol (0.4 mmol), phenyl isocyanate (0.4 mmol) and  $\text{Et}_3\text{N}$  (0.5 mmol) were stirred in anhydrous  $\text{CH}_2\text{Cl}_2$  (5 mL) at room temperature for 12 h. Volatiles were removed under reduced pressure and residue was purified by a silica gel flash column chromatography (eluent: hexane/EtOAc = 25/1) to afford the corresponding carbamate derivative for the HPLC determination of enantiomeric excess. Chiralcel OJ, hexane/*i*-PrOH = 95/5, 0.7 mL/min, 254 nm,  $t_S = 7.043$  min,  $t_R = 9.042$  min.

**(R)-4-(4-Methoxyphenyl)-2-butanol (9l)**: Yield: 87% (78 mg).  $^1\text{H NMR}$  (300 MHz,  $\text{CDCl}_3$ , TMS)  $\delta$  1.22 (d,  $J = 6.0$  Hz, 3H,  $\text{CH}_3$ ), 1.69-1.77 (m, 2H,  $\text{CH}_2$ ), 2.59-2.70 (m, 2H,  $\text{CH}_2$ ), 3.78 (s, 3H,  $\text{CH}_3$ ), 3.81 (q,  $J = 6.0$  Hz, 1H, CH), 6.81-6.86 (m, 2H, ArH), 7.10-7.14 (m, 2H, ArH);  $[\alpha]_D^{20} = -11.20$  (c 3.5,  $\text{CHCl}_3$ ) for 71% ee; Chiralpak AD, hexane/*i*-PrOH = 95/5, 0.7 mL/min, 254 nm,  $t_S = 15.900$  min,  $t_R = 16.673$  min.

**(R)-Noan-2-ol (9m)**: Yield: 86% (62 mg).  $^1\text{H NMR}$  (300 MHz,  $\text{CDCl}_3$ , TMS)  $\delta$  0.88 (t,  $J = 7.2$  Hz, 3H,  $\text{CH}_3$ ), 1.17 (d,  $J = 6.3$  Hz, 3H,  $\text{CHCH}_3$ ), 1.23-1.50 (m, 12H,  $(\text{CH}_2)_6$ ), 1.96 (br, 1H, OH), 3.73-3.80 (m, 1H, CH);  $[\alpha]_D^{20} = -5.32$  (c 3.1,  $\text{CHCl}_3$ ) for 67% ee;

**Derivation with acetyl chloride**: The alcohol (0.4 mmol) was dissolved in anhydrous THF (4 mL),

# Supplementary Material (ESI) for Chemical Communications  
# This journal is © The Royal Society of Chemistry 2003

acetyl chloride (2.0 mmol) and Et<sub>3</sub>N (2.0 mmol) were added and the mixture kept at ambient temperature for 12 h. The reaction was quenched by addition of H<sub>2</sub>O. The organic compound was extracted with Et<sub>2</sub>O (2 x 10 mL) and dried over anhydrous Na<sub>2</sub>SO<sub>4</sub>. The filtrate was used for the GC determination of the enantiomeric excess. Rt-βDexcst<sup>TM</sup> 30 m x 0.25 mm x 0.25 μm, 110 °C, Carrier: N<sub>2</sub> 10psi. *t*<sub>S</sub> = 15.960 min, *t*<sub>R</sub> = 17.250 min.

Software Version: 4.1<2F12>

Date: 03-4-14 9:45

Sample Name : D198-RAC

Data File : D:\TC4\DATA\CAO\CAP\_008K.RAW Date: 03-4-14 9:01

Sequence File: D:\TC4\DATA\CAO\CAP.SEQ Cycle: 1 Channel : A

Instrument : 970A\_0 Rack/Vial: 0/0 Operator: cao

Sample Amount : 1.0000 Dilution Factor : 1.00

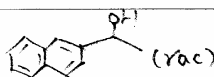

Chiralcel OJ 254mm 2.7ml/min  
Hexane:2-proH = 75:25

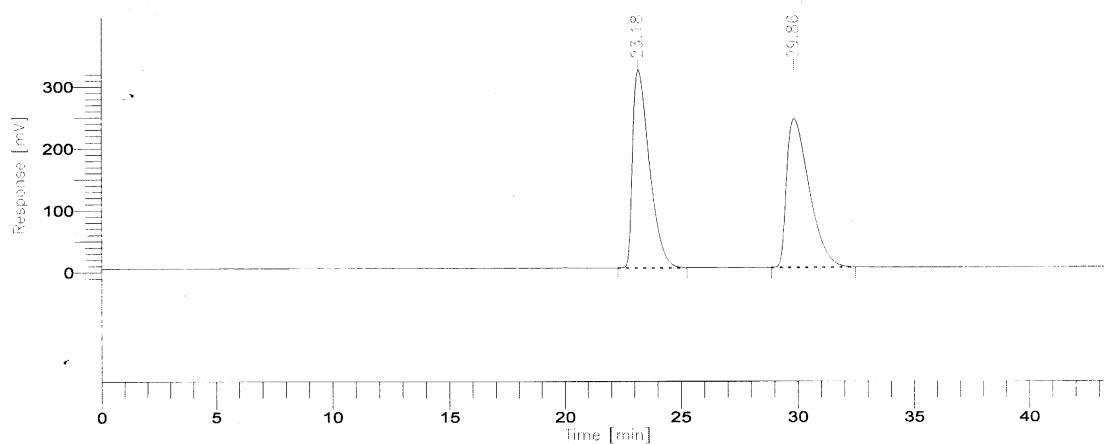

### REPORT

| Peak # | Time [min] | Area [uV*sec] | Height [uV] | Area [%] | Norm. Area [%] | Area BL | Area/Height [sec] |
|--------|------------|---------------|-------------|----------|----------------|---------|-------------------|
| 1      | 23.184     | 16045640.75   | 319195.59   | 49.88    | 0.00           | BB      | 50.2690           |
| 2      | 29.861     | 16123704.50   | 239871.14   | 50.12    | 0.00           | BB      | 67.2182           |
|        |            | 32169345.25   | 559066.73   | 100.00   | 0.00           |         |                   |

Software Version: 4.1<2F12>

Date: 03-4-14 13:21

Sample Name : D198-101

Data File : D:\TC4\DATA\CAO\CAP\_008M.RAW Date: 03-4-14 10:31

Sequence File: D:\TC4\DATA\CAO\CAP.SEQ Cycle: 1 Channel : A

Instrument : 970A\_0 Rack/Vial: 0/0 Operator: cao

Sample Amount : 1.0000

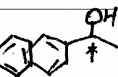

96% ee  
chiralcel OJ 254nm  
0.7 mL/min Hexane: i-PrOH  
= 95:5

Dilution Factor : 1.00

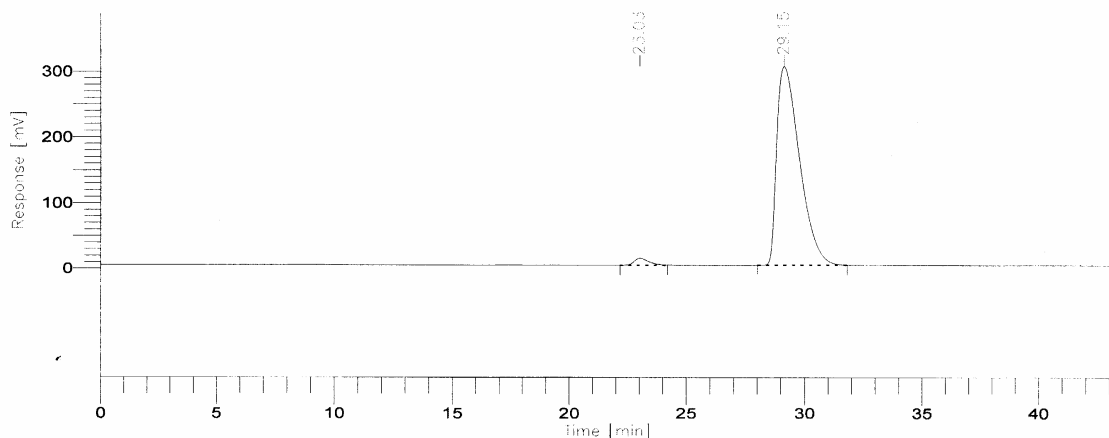

### REPORT

| Peak # | Time [min] | Area [uV*sec] | Height [uV] | Area [%] | Norm. Area [%] | Area BL | Area/Height [sec] |
|--------|------------|---------------|-------------|----------|----------------|---------|-------------------|
| 1      | 23.031     | 448689.50     | 10770.67    | 2.16     | 0.00           | BB      | 41.6585           |
| 2      | 29.146     | 20309990.00   | 302515.29   | 97.84    | 0.00           | BB      | 67.1371           |
|        |            | 20758679.50   | 313285.96   | 100.00   | 0.00           |         |                   |

Software Version: 4.1<2F12>

Date: 03-4-17 14:20

Sample Name : d199-rac

Data File : D:\TC4\DATA\CAO\CAP\_009G.RAW Date: 03-4-17 13:48

Sequence File: D:\TC4\DATA\CAO\CAP.SEQ Cycle: 1 Channel : A

Instrument : 970A - 0 Rack/Vial: 0/0 Operator: cao

Sample Amount : 1.0000

Dilution Factor : 1.00

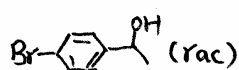

Chiracel OJ 254nm 0.7ml/min

Hexane : i-PrOH = 95 : 5

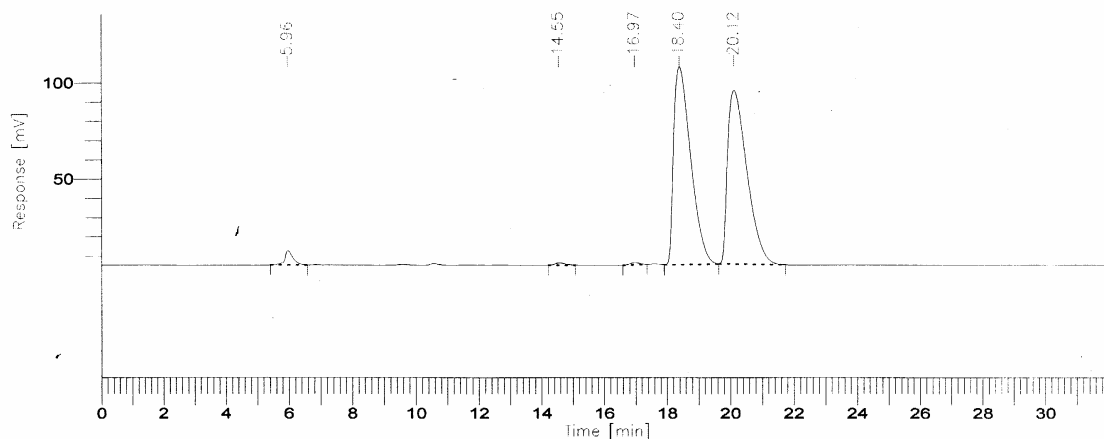

### REPORT

| Peak # | Time [min] | Area [uV*sec] | Height [uV] | Area [%] | Norm. Area [%] | Area BL | Area/Height [sec] |
|--------|------------|---------------|-------------|----------|----------------|---------|-------------------|
| 1      | 5.964      | 133871.50     | 7366.33     | 1.71     | 0.00           | BB      | 18.1734           |
| 2      | 14.551     | 26437.50      | 1201.58     | 0.34     | 0.00           | BB      | 22.0023           |
| 3      | 16.973     | 22781.75      | 1064.82     | 0.29     | 0.00           | BB      | 21.3949           |
| 4      | 18.397     | 3833404.50    | 102367.01   | 48.89    | 0.00           | BB      | 37.4477           |
| 5      | 20.121     | 3824602.25    | 90183.44    | 48.78    | 0.00           | BB      | 42.4091           |
|        |            | 7841097.50    | 202183.17   | 100.00   | 0.00           |         |                   |

Software Version: 4.1<2F12>

Date: 03-4-17 15:43

Sample Name : d-199-104-1

Data File : D:\TC4\DATA\CAO\CAP\_009H.RAW Date: 03-4-17 14:27

Sequence File: D:\TC4\DATA\CAO\CAP.SEQ Cycle: 1 Channel : A

Instrument : 970A\_0 Rack/Vial: 0/0 Operator: cao

Sample Amount : 1.0000

Dilution Factor : 1.00

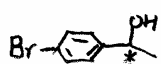

95% ee

Chiracel OJ 254nm 0.7ml/min

Hexane: i-PrOH = 95:5

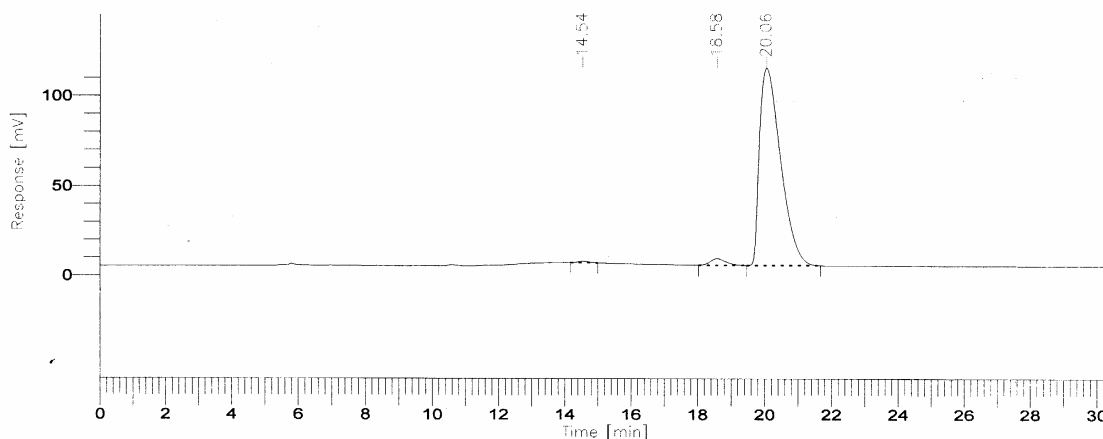

### REPORT

| Peak # | Time [min] | Area [uV*sec] | Height [uV] | Area [%] | Norm. Area [%] | Area BL | Area/Height [sec] |
|--------|------------|---------------|-------------|----------|----------------|---------|-------------------|
| 1      | 14.543     | 18136.25      | 815.98      | 0.37     | 0.00           | BB      | 22.2265           |
| 2      | 18.579     | 122717.50     | 3816.40     | 2.48     | 0.00           | BB      | 32.1553           |
| 3      | 20.060     | 4808804.00    | 109724.61   | 97.15    | 0.00           | BB      | 43.8261           |
|        |            | 4949657.75    | 114356.98   | 100.00   | 0.00           |         |                   |

\*\*\*\*\* MODEL 1022 RUNLOG for run: CH-9\_66 \*\*\*\*\*

Run terminated via Button or External Stop.

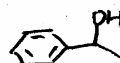

Chiracel OJ 254nm  
0.7 ml/min  
Hexane : i-PrOH = 95 : 5

File : CH-9\_66.D01 D-194RAC  
Run : 01 Type : Sample  
Path : C:\CH-5 Inst : 1022 LC Plus  
Collection : 14:09:55 Apr 28 2003 Method : LCTEST [ 14:09:45 Apr 28 2003 ]  
Integration : 14:09:55 Apr 28 2003 Method : LCTEST [ 14:09:45 Apr 28 2003 ]  
Report : 15:03:16 Apr 28 2003 Method : LCTEST [ 14:09:45 Apr 28 2003 ]

PERCENT ( AREA )

| Pk # | RT     | Area     | Height   | BC | Area Percent | Height Percent |
|------|--------|----------|----------|----|--------------|----------------|
| 1    | 6.333  | 462836   | 2.9051   |    | 0.4624       | 1.3303         |
| 2    | 7.327  | 497537   | 1.6148   | V  | 0.4971       | 0.7395         |
| 3    | 8.227  | 777507   | 2.0150   |    | 0.7768       | 0.9227         |
| 4    | 9.360  | 80636    | 0.4153   |    | 0.0806       | 0.1902         |
| 5    | 11.140 | 31900    | 0.1742   | T  | 0.0319       | 0.0798         |
| 6    | 11.827 | 70433    | 0.3357   |    | 0.0704       | 0.1537         |
| 7    | 13.540 | 371263   | 1.8486   |    | 0.3709       | 0.8465         |
| 8    | 18.380 | 1349842  | 3.5246   | T  | 1.3485       | 1.6140         |
| 9    | 19.340 | 47686880 | 109.1875 | T  | 47.6408      | 50.0002        |
| 10   | 22.273 | 47848076 | 95.0631  |    | 47.8018      | 43.5322        |
| 11   | 26.367 | 118562   | 0.2623   |    | 0.1184       | 0.1201         |
| 12   | 29.620 | 123472   | 0.1938   |    | 0.1234       | 0.0887         |
| 13   | 39.913 | 314710   | 0.4166   |    | 0.3144       | 0.1908         |
| 14   | 44.153 | 363054   | 0.4177   |    | 0.3627       | 0.1913         |

14 Peaks > Area Reject 100096712 Total Area  
14 Peaks > Height Reject 218.374 Total Height

(CH-9\_66.D01) MU

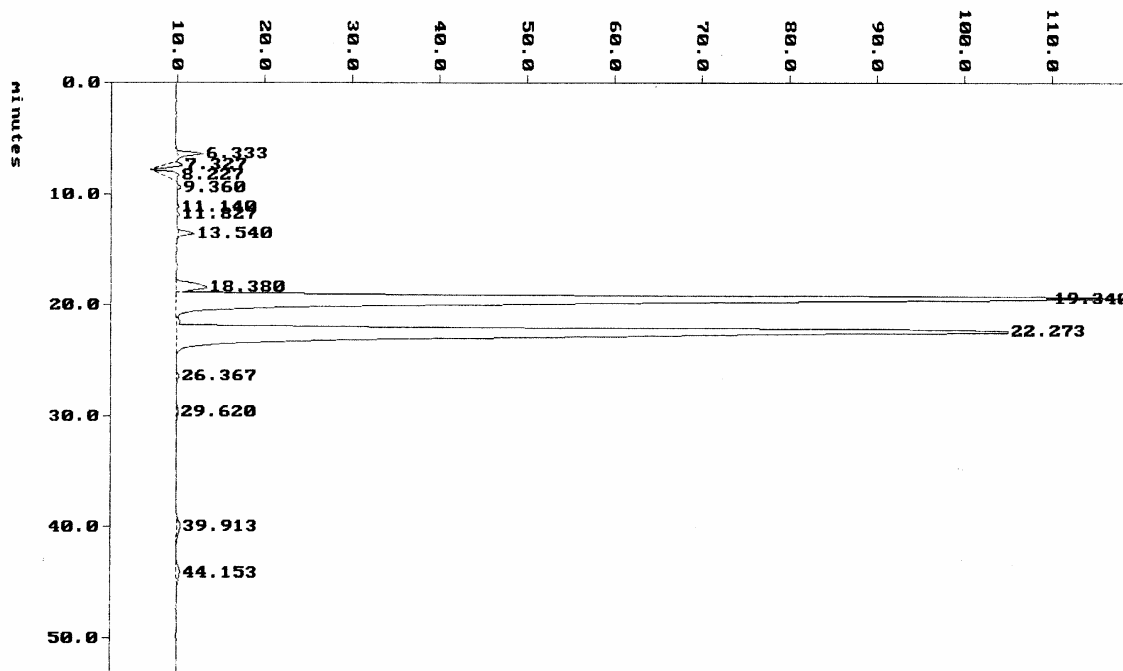



Chiracel OJ 254nm 0.7ml/min  
Hexane : i-PrOH = 95:5

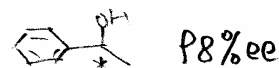

\*\*\*\*\* MODEL 1022 RUNLOG for run: CH-9\_67 \*\*\*\*\*

Run terminated manually on Channel A.

File : CH-9\_67.D01 D-194-106 1  
Run : 01 Type : Sample  
Path : C:\CH-5 Inst : 1022 LC Plus  
Collection : 15:03:32 Apr 28 2003 Method : LCTEST [ 14:09:45 Apr 28 2003 ]  
Integration: 15:03:32 Apr 28 2003 Method : LCTEST [ 14:09:45 Apr 28 2003 ]  
Report : 15:33:50 Apr 28 2003 Method : LCTEST [ 14:09:45 Apr 28 2003 ]

PERCENT ( AREA )

| Pk # | RT     | Area     | Height   | BC | Area Percent | Height Percent |
|------|--------|----------|----------|----|--------------|----------------|
| 1    | 6.050  | 782533   | 3.2772   |    | 0.9059       | 1.9259         |
| 2    | 11.577 | 3336053  | 16.6617  |    | 3.8619       | 9.7918         |
| 3    | 13.230 | 209283   | 0.6028   |    | 0.2423       | 0.3542         |
| 4    | 19.457 | 950921   | 2.9691   |    | 1.1008       | 1.7449         |
| 5    | 21.737 | 81105552 | 146.6485 |    | 93.8892      | 86.1831        |

5 Peaks > Area Reject 86384344 Total Area  
5 Peaks > Height Reject 170.159 Total Height

(CH-9\_67.D01) mV

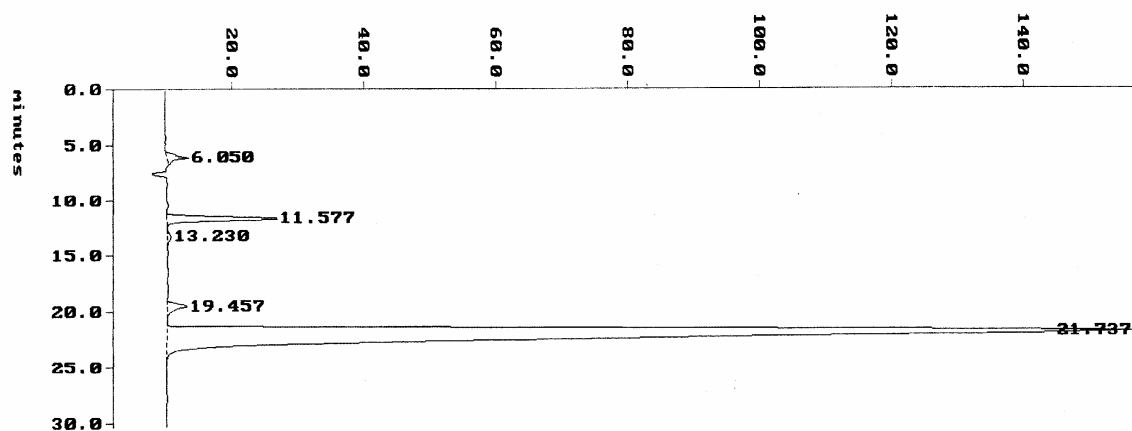

Chirapak As 254nm 0.7ml/min  
Hexane : i-PrOH = 95 : 5

\*\*\*\*\* MODEL 1022 RUNLOG for run: CH-2\_\_11 \*\*\*\*\*  
Run terminated manually on Channel A.

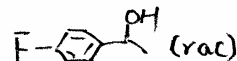

File : CH-2\_\_11.D01 d-206rpack 1  
Run : 01 Type : Sample  
Path : C:\CH-6 Inst : 1022 LC Plus  
Collection : 15:50:58 May 29 2003 Method : LCTEST [ 08:22:43 May 29 2003 ]  
Integration : 15:50:58 May 29 2003 Method : LCTEST [ 08:22:43 May 29 2003 ]  
Report : 16:06:35 May 29 2003 Method : LCTEST [ 08:22:43 May 29 2003 ]

PERCENT ( AREA )

| Pk # | RT     | Area     | Height   | BC | Area Percent | Height Percent |
|------|--------|----------|----------|----|--------------|----------------|
| 1    | 4.247  | 779871   | 5.4404   |    | 0.6344       | 0.7722         |
| 2    | 4.943  | 512951   | 1.9999   |    | 0.4172       | 0.2839         |
| 3    | 5.850  | 62020    | 0.4459   |    | 0.0504       | 0.0633         |
| 4    | 7.183  | 24865    | 0.1522   |    | 0.0202       | 0.0216         |
| 5    | 8.623  | 53437    | 0.2002   | V  | 0.0435       | 0.0284         |
| 6    | 9.657  | 60944580 | 379.4578 | T  | 49.5730      | 53.8604        |
| 7    | 10.543 | 60107416 | 314.7272 |    | 48.8921      | 44.6725        |
| 8    | 12.283 | 231004   | 1.0991   |    | 0.1879       | 0.1560         |
| 9    | 14.003 | 222854   | 0.9983   |    | 0.1813       | 0.1417         |

9 Peaks > Area Reject 122939000 Total Area  
9 Peaks > Height Reject 704.521 Total Height

(CH-2\_\_11.D01) mU

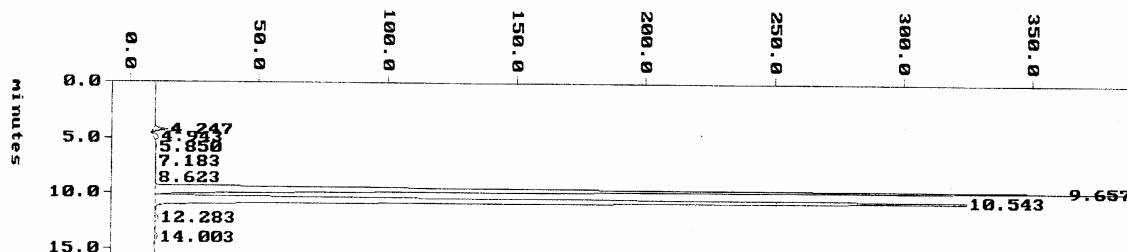

\*\*\*\*\* MODEL 1022 RUNLOG for run: CH-2\_\_12 \*\*\*\*\*

Run terminated manually on Channel A.

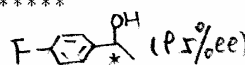

Chira pak As 254nm

0.7ml/min

Hexane: 2-proH = 95:5

File : CH-2\_\_12.D01 d-206-110  
Run : 01 Type : Sample  
Path : C:\CH-6 Inst : 1022 LC Plus  
Collection : 16:07:30 May 29 2003 Method : LCTEST [ 08:22:43 May 29 2003 ]  
Integration: 16:07:30 May 29 2003 Method : LCTEST [ 08:22:43 May 29 2003 ]  
Report : 16:25:37 May 29 2003 Method : LCTEST [ 08:22:43 May 29 2003 ]

PERCENT ( AREA )

| Pk # | RT     | Area      | Height   | BC | Area Percent | Height Percent |
|------|--------|-----------|----------|----|--------------|----------------|
| 1    | 4.243  | 535797    | 4.2482   | T  | 0.4531       | 0.6259         |
| 2    | 4.497  | 163133    | 1.6304   | V  | 0.1380       | 0.2402         |
| 3    | 5.420  | 301039    | 2.4046   | V  | 0.2546       | 0.3543         |
| 4    | 5.967  | 430346    | 2.6842   | T  | 0.3639       | 0.3955         |
| 5    | 6.707  | 836939    | 3.1751   | T  | 0.7078       | 0.4678         |
| 6    | 7.187  | 3739345   | 16.2362  |    | 3.1624       | 2.3922         |
| 7    | 9.580  | 109336464 | 635.0581 | T  | 92.4663      | 93.5691        |
| 8    | 10.607 | 2901545   | 13.2684  |    | 2.4538       | 1.9550         |

8 Peaks > Area Reject 118244608 Total Area  
8 Peaks > Height Reject 678.705 Total Height

(CH-2\_\_12.D01) AU

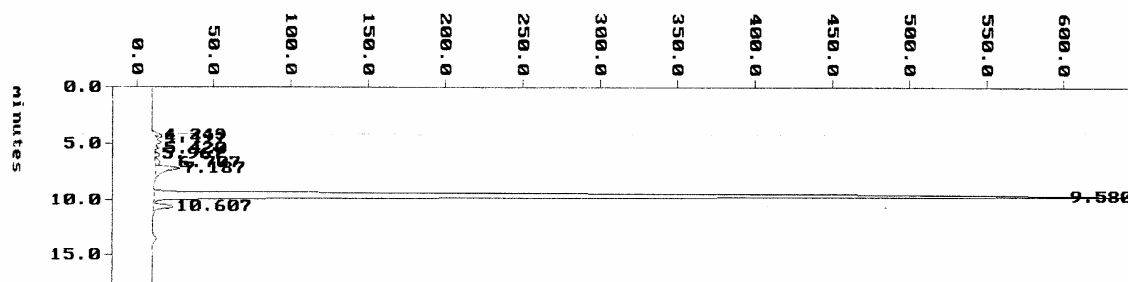

\*\*\*\*\* MODEL 1022 RUNLOG for run: CH-2\_\_68 \*\*\*\*\*

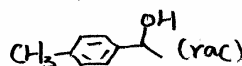

Run terminated manually on Channel A.

Chiracel OJ 254nm 0.7ml/min

File : CH-2\_\_68.D01

d-201-rac

Hexane : i-proh = 95 : 5

Run : 01

Type : Sample

Path : C:\CH-6

Inst : 1022 LC Plus

Collection : 10:08:58 Jun 11 2003 Method : LCTEST [ 09:28:19 Jun 11 2003 ]

Integration : 10:08:58 Jun 11 2003 Method : LCTEST [ 09:28:19 Jun 11 2003 ]

Report : 10:55:35 Jun 11 2003 Method : LCTEST [ 09:28:19 Jun 11 2003 ]

PERCENT ( AREA )

| Pk # | RT     | Area     | Height  | BC | Area Percent | Height Percent |
|------|--------|----------|---------|----|--------------|----------------|
| 1    | 4.813  | 80954    | 0.6140  | T  | 0.0962       | 0.4175         |
| 2    | 5.193  | 110713   | 1.1061  | T  | 0.1316       | 0.7520         |
| 3    | 5.420  | 272782   | 1.8205  |    | 0.3241       | 1.2377         |
| 4    | 9.713  | 156060   | 0.9315  |    | 0.1854       | 0.6333         |
| 5    | 11.267 | 293514   | 1.6073  |    | 0.3488       | 1.0928         |
| 6    | 17.887 | 921037   | 3.4495  | T  | 1.0944       | 2.3452         |
| 7    | 18.473 | 1009556  | 3.2764  | T  | 1.1996       | 2.2276         |
| 8    | 19.687 | 1922607  | 5.6637  | T  | 2.2845       | 3.8506         |
| 9    | 21.420 | 1912632  | 5.3350  |    | 2.2726       | 3.6271         |
| 10   | 24.127 | 38620792 | 66.0974 |    | 45.8902      | 44.9378        |
| 11   | 27.940 | 38780868 | 56.9497 |    | 46.0804      | 38.7185        |
| 12   | 33.553 | 77644    | 0.2353  |    | 0.0923       | 0.1600         |

12 Peaks > Area Reject

84159160 Total Area

12 Peaks > Height Reject

147.086 Total Height

(CH-2\_\_68.D01) AU

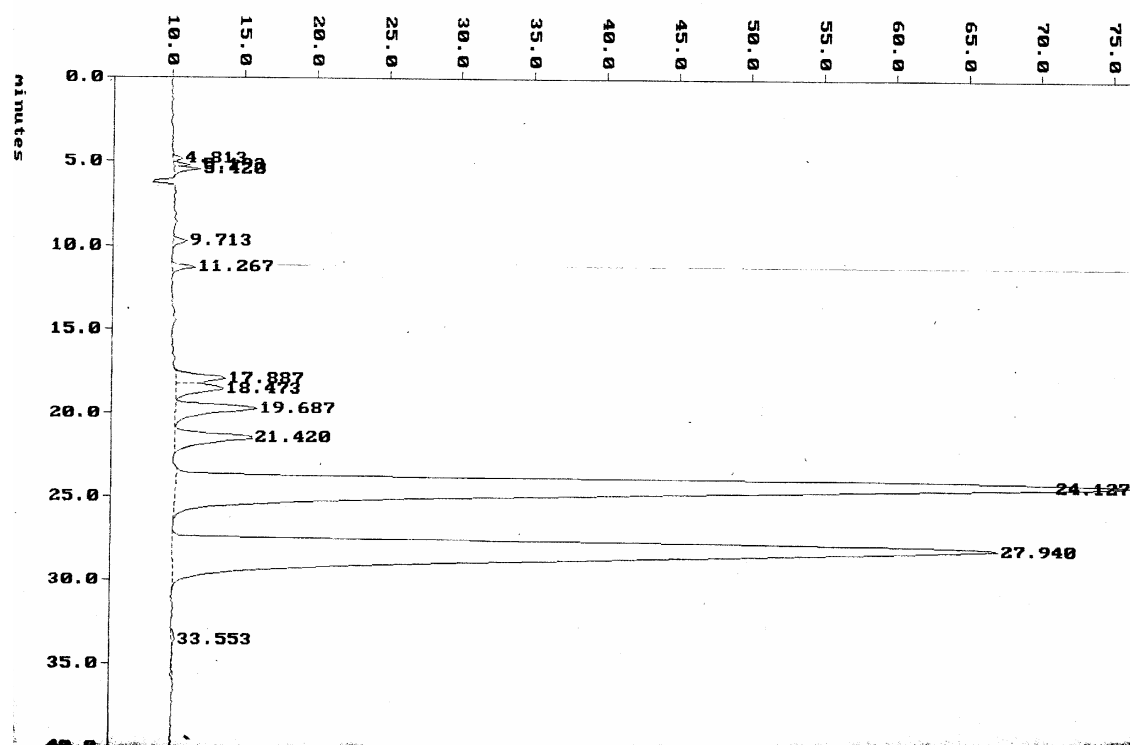

\*\*\*\*\* MODEL 1022 RUNLOG for run: CH-2\_70 \*\*\*\*\*

Run terminated manually on Channel A.

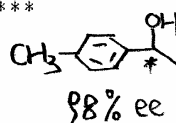

Chiralcel OJ 254nm

0.7 mL/min

Hexane : i-PrOH = 95:5

File : CH-2\_70.D01

d-201-120

Run : 02

Path : C:\CH-6

Type : Sample

Inst : 1022 LC Plus

Collection : 14:08:16 Jun 11 2003 Method : LCTEST [ 09:28:19 Jun 11 2003 ]

Integration : 14:08:16 Jun 11 2003 Method : LCTEST [ 09:28:19 Jun 11 2003 ]

Report : 14:41:22 Jun 11 2003 Method : LCTEST [ 09:28:19 Jun 11 2003 ]

PERCENT ( AREA )

| Pk # | RT     | Area     | Height  | BC | Area Percent | Height Percent |
|------|--------|----------|---------|----|--------------|----------------|
| 1    | 3.880  | 45856    | 0.3969  |    | 0.0588       | 0.3439         |
| 2    | 4.353  | 151791   | 1.0581  |    | 0.1948       | 0.9170         |
| 3    | 9.560  | 57944    | 0.3038  |    | 0.0744       | 0.2633         |
| 4    | 11.147 | 327310   | 1.6395  |    | 0.4200       | 1.4208         |
| 5    | 14.953 | 72667    | 0.1425  |    | 0.0932       | 0.1235         |
| 6    | 17.660 | 1504079  | 4.2457  |    | 1.9300       | 3.6793         |
| 7    | 20.980 | 3754988  | 9.7777  |    | 4.8184       | 8.4731         |
| 8    | 23.500 | 868616   | 2.2424  |    | 1.1146       | 1.9432         |
| 9    | 26.473 | 71147248 | 95.5894 |    | 91.2958      | 82.8359        |

9 Peaks > Area Reject 77930496 Total Area  
9 Peaks > Height Reject 115.396 Total Height

(CH-2\_70.D01) MV

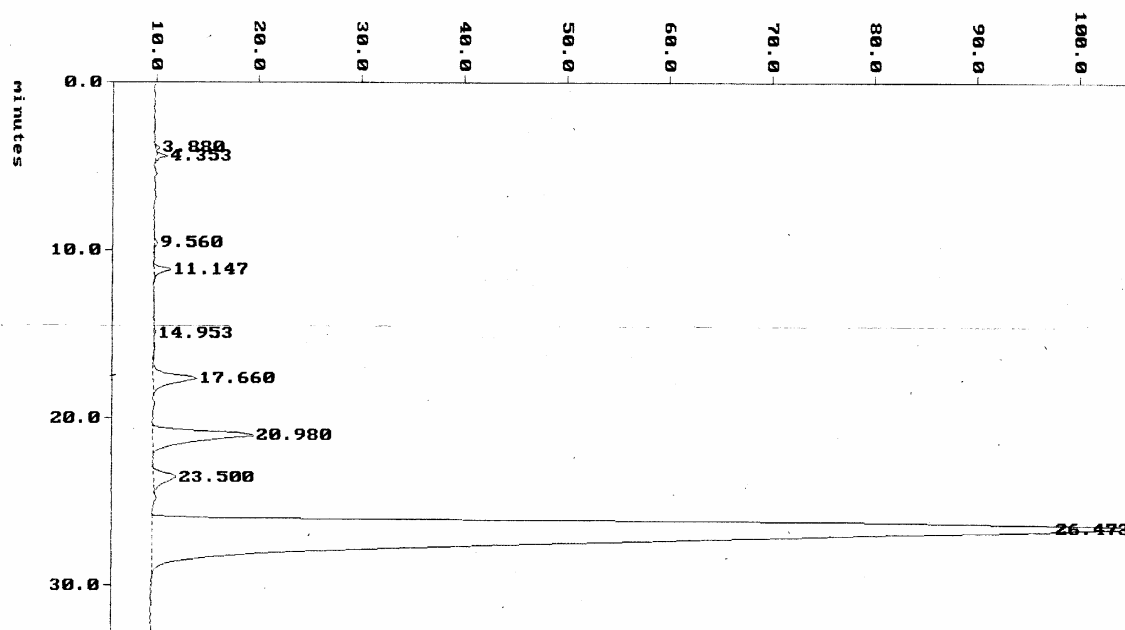

Software Version: 4.1<2F12>

Date: 03-6-6 13:56

Sample Name : d-202rac

Data File : D:\TC4\DATA\CAO\CAP\_018T.RAW Date: 03-6-6 13:30

Sequence File: D:\TC4\DATA\CAO\CAP.SEQ Cycle: 1 Channel : A

Instrument : 970A - 0 Rack/Vial: 0/0 Operator: cao

Sample Amount : 1.0000

Dilution Factor : 1.00

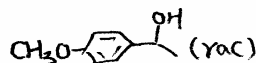

Chirapak As 254mm

0.7mL/min

Hexane : i-proh = 90:10

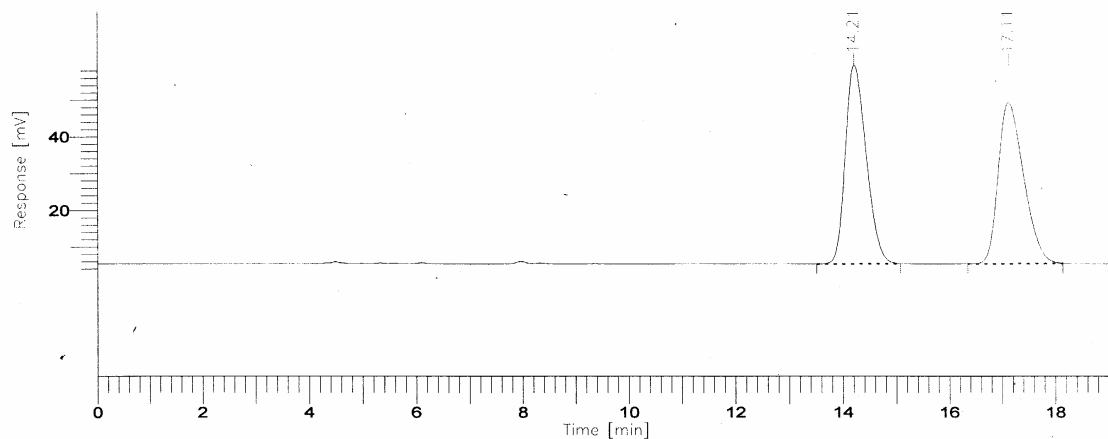

### REPORT

| Peak # | Time [min] | Area [uV*sec] | Height [uV] | Area [%] | Norm. Area [%] | Area BL | Area/Height [sec] |
|--------|------------|---------------|-------------|----------|----------------|---------|-------------------|
| 1      | 14.208     | 1466007.25    | 54186.44    | 49.99    | 0.00           | BB      | 27.0549           |
| 2      | 17.113     | 1466662.00    | 43933.82    | 50.01    | 0.00           | BB      | 33.3834           |
|        |            | 2932669.25    | 98120.26    | 100.00   | 0.00           |         |                   |

Software Version: 4.1<2F12>

Date: 03-6-6 14:17

Sample Name : d-202-106

Data File : D:\TC4\DATA\CAO\CAP\_018U.RAW Date: 03-6-6 13:52

Sequence File: D:\TC4\DATA\CAO\CAP.SEQ Cycle: 1 Channel : A

Instrument : 970A\_0 Rack/Vial: 0/0 Operator: cao

Sample Amount : 1.0000

Dilution Factor : 1.00

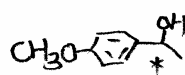

Chiralpak AS 254nm

0.7 ml/min

Hexane: i-PrOH = 90:10

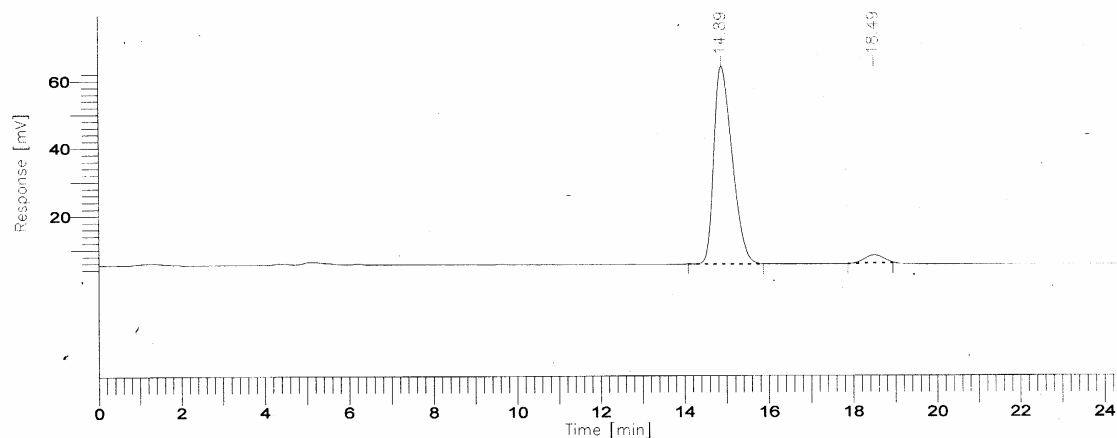

### REPORT

| Peak # | Time [min] | Area [uV*sec] | Height [uV] | Area [%] | Norm. Area [%] | Area BL | Area/Height [sec] |
|--------|------------|---------------|-------------|----------|----------------|---------|-------------------|
| 1      | 14.885     | 1766035.00    | 58489.43    | 96.11    | 0.00           | BB      | 30.1941           |
| 2      | 18.491     | 71538.00      | 2362.00     | 3.89     | 0.00           | BB      | 30.2871           |
|        |            | 1837573.00    | 60851.43    | 100.00   | 0.00           |         |                   |

Software Version: 4.1<2F12>

Date: 03-6-12 16:22

Sample Name : d-207rac

Data File : D:\TC4\DATA\CAO\CAP\_019Q.RAW Date: 03-6-12 15:17

Sequence File: D:\TC4\DATA\CAO\CAP.SEQ Cycle: 1 Channel : A

Instrument : 970A\_0 Rack/Vial: 0/0 Operator: cao

Sample Amount : 1.0000

Chiralcel OJ 254 nm 0.7ml/min

Hexane : i-PrOH = 95:5

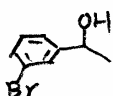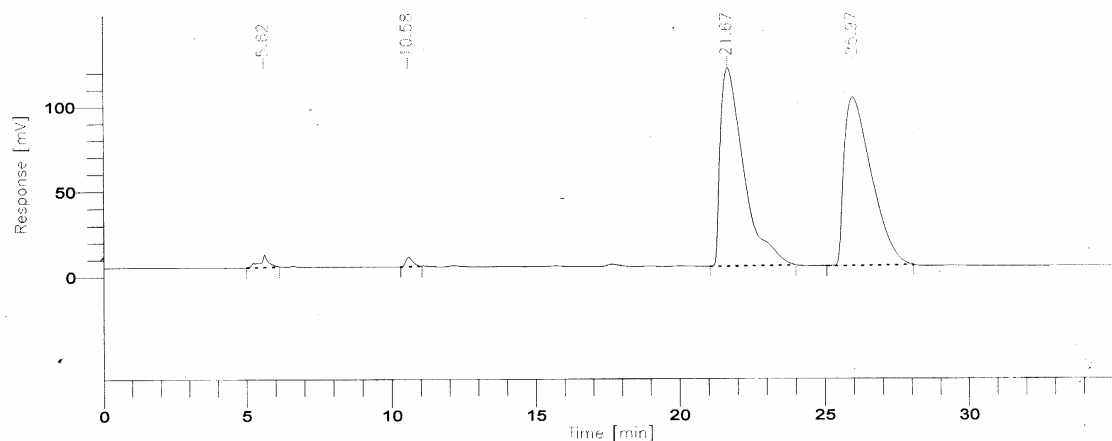

### REPORT

| Peak # | Time [min] | Area [uV*sec] | Height [uV] | Area [%] | Norm. Area [%] | Area BL | Area/Height [sec] |
|--------|------------|---------------|-------------|----------|----------------|---------|-------------------|
| 1      | 5.621      | 145266.00     | 7308.11     | 1.10     | 0.00           | BB      | 19.8774           |
| 2      | 10.584     | 92014.00      | 5379.62     | 0.70     | 0.00           | BB      | 17.1042           |
| 3      | 21.672     | 6488531.00    | 116414.13   | 49.19    | 0.00           | BB      | 55.7366           |
| 4      | 25.974     | 6464067.00    | 98854.16    | 49.01    | 0.00           | BB      | 65.3899           |
|        |            | 13189878.00   | 227956.02   | 100.00   | 0.00           |         |                   |



Software Version: 4.1<2F12>

Date: 03-6-12 16:28

Sample Name : d-207-120

Data File : D:\TC4\DATA\CAO\CAP\_019R.RAW Date: 03-6-12 15:55

Sequence File: D:\TC4\DATA\CAO\CAP.SEQ Cycle: 1 Channel : A

Instrument : 970A\_0 Rack/Vial: 0/0 Operator: cao

Sample Amount : 1.0000

Dilution Factor : 1.00

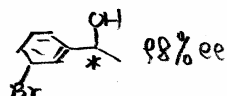

Chiracel OJ 254nm 0.7ml/min

Hexane : 2-propr = 95:5

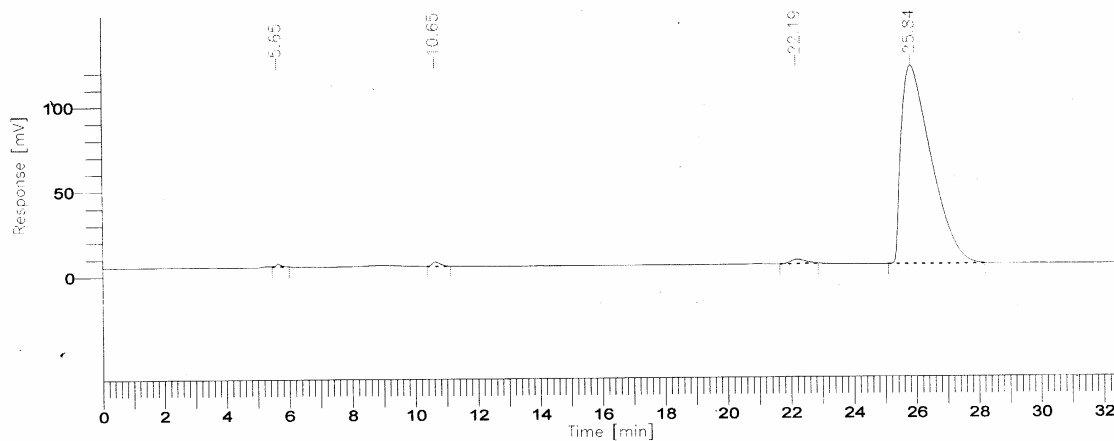

### REPORT

| Peak # | Time [min] | Area [uV*sec] | Height [uV] | Area [%] | Norm. Area [%] | Area BL | Area/Height [sec] |
|--------|------------|---------------|-------------|----------|----------------|---------|-------------------|
| 1      | 5.645      | 17623.00      | 1704.48     | 0.22     | 0.00           | BB      | 10.3392           |
| 2      | 10.645     | 44362.00      | 2516.44     | 0.56     | 0.00           | BB      | 17.6289           |
| 3      | 22.192     | 82201.50      | 2512.46     | 1.04     | 0.00           | BB      | 32.7176           |
| 4      | 25.838     | 7742756.50    | 116513.31   | 98.17    | 0.00           | BB      | 66.4538           |
|        |            | 7886943.00    | 123246.68   | 100.00   | 0.00           |         |                   |

Software Version: 4.1<2F12>

Date: 03-6-2 13:13

Sample Name : d-208rac

Data File : D:\TC4\DATA\CAO\CAP\_017N.RAW Date: 03-6-2 12:23

Sequence File: D:\TC4\DATA\CAO\CAP\_SEQ Cycle: 1 Channel : A

Instrument : 970A\_0 Rack/Vial: 0/0 Operator: cao

Sample Amount : 1.0000

Dilution Factor : 1.00

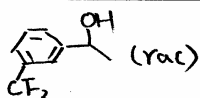

Chiralcel OJ 254nm 0.7ml/min

Hexane : 2-proH = 100 : 1

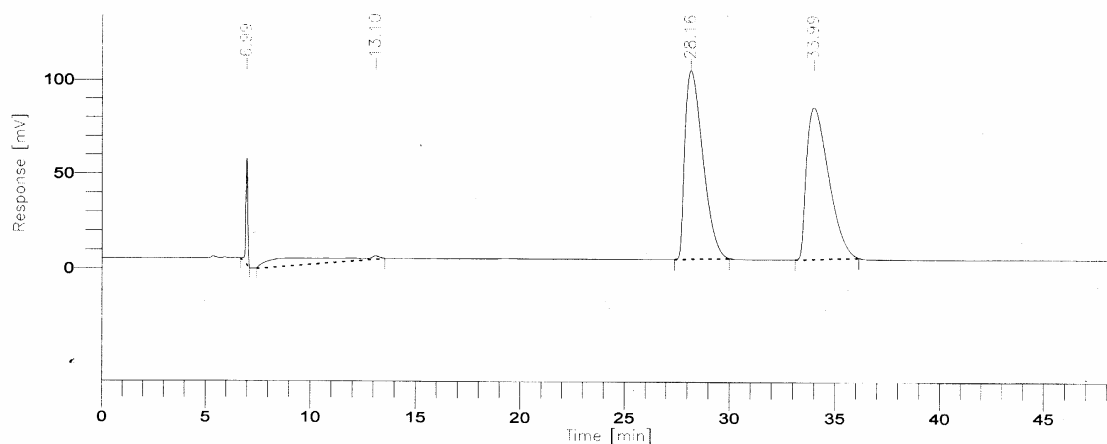

### REPORT

| Peak # | Time [min] | Area [uV*sec] | Height [uV] | Area [%] | Norm. Area [%] | Area BL | Area/Height [sec] |
|--------|------------|---------------|-------------|----------|----------------|---------|-------------------|
| 1      | 6.987      | 361468.00     | 56527.78    | 2.78     | 0.00           | BB      | 6.3945            |
| 2      | 13.103     | 875117.75     | 1639.58     | 6.73     | 0.00           | BB      | 533.7456          |
| 3      | 28.163     | 5900763.25    | 99827.61    | 45.40    | 0.00           | BB      | 59.1095           |
| 4      | 33.992     | 5860093.00    | 80222.09    | 45.09    | 0.00           | BB      | 73.0484           |
|        |            | 12997442.00   | 238217.05   | 100.00   | 0.00           |         |                   |

Software Version: 4.1<2F12>

Date: 03-6-2 14:08

Sample Name : d-208-110

Data File : D:\TC4\DATA\CAO\CAP\_0170.RAW Date: 03-6-2 13:23

Sequence File: D:\TC4\DATA\CAO\CAP.SEQ Cycle: 1 Channel : A

Instrument : 970A\_0 Rack/Vial: 0/0 Operator: cao

Sample Amount : 1.0000

Dilution Factor : 1.00

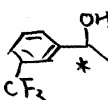

98% ee Chiralcel OJ 254nm 0.7ml/min  
Hexane: i-PrOH = 100:1

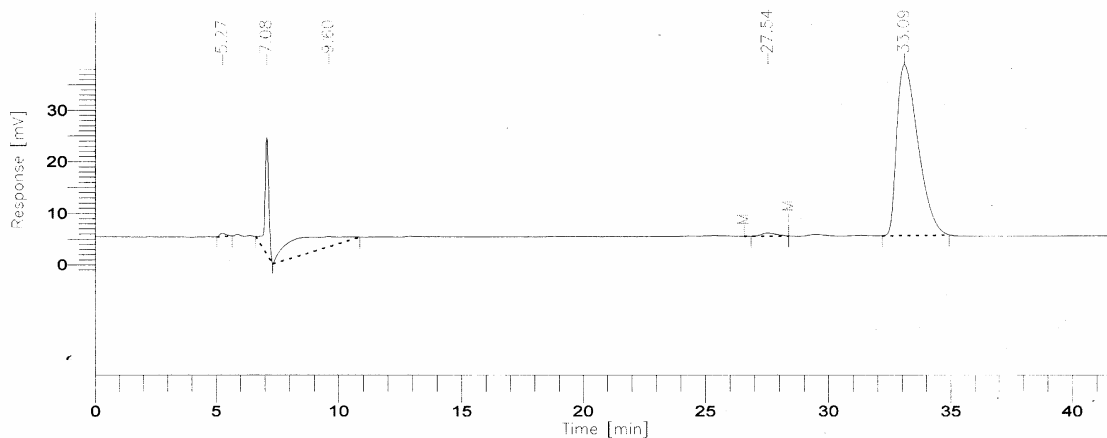

### REPORT

| Peak # | Time [min] | Area [uV*sec] | Height [uV] | Area [%] | Norm. Area [%] | Area BL | Area/Height [sec] |
|--------|------------|---------------|-------------|----------|----------------|---------|-------------------|
| 1      | 5.267      | 11360.50      | 672.11      | 0.42     | 0.00           | BB      | 16.9029           |
| 2      | 7.079      | 251399.50     | 22639.38    | 9.21     | 0.00           | BB      | 11.1045           |
| 3      | 9.599      | 429915.00     | 1912.06     | 15.75    | 0.00           | BB      | 224.8437          |
| 4      | 27.539     | 25211.27      | 619.90      | 0.92     | 0.00           | *BB     | 40.6700           |
| 5      | 33.094     | 2012158.50    | 33100.79    | 73.70    | 0.00           | BB      | 60.7888           |
|        |            | 2730044.77    | 58944.23    | 100.00   | 0.00           |         |                   |

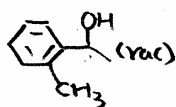

Chiropak AD 254 nm 0.7 mL/min

Hexane : i-proh = 95 : 5

File : CH-2\_18.D01 d-211 1  
Run : 01 Type : Sample  
Path : C:\CH-6 Inst : 1022 LC Plus  
Collection : 10:36:23 May 30 2003 Method : LCTEST [ 08:22:11 May 30 2003 ]  
Integration : 09:51:46 Jun 02 2003 Method : LCTEST [ 08:47:45 Jun 02 2003 ]  
Report : 09:51:49 Jun 02 2003 Method : LCTEST [ 08:47:45 Jun 02 2003 ]

PERCENT ( AREA )

| PK # | RT     | Area     | Height  | BC | Area Percent | Height Percent |
|------|--------|----------|---------|----|--------------|----------------|
| 1    | 0.677  | 36313    | 0.2828  |    | 0.1635       | 0.1627         |
| 2    | 4.093  | 19811    | 0.2304  | T  | 0.0892       | 0.1325         |
| 3    | 4.363  | 181260   | 2.4578  |    | 0.8162       | 1.4136         |
| 4    | 5.100  | 370154   | 1.0971  |    | 1.6668       | 0.6310         |
| 5    | 6.213  | 63928    | 0.3455  |    | 0.2879       | 0.1987         |
| 6    | 7.433  | 170447   | 2.1110  |    | 0.7675       | 1.2141         |
| 7    | 10.820 | 10575318 | 87.6955 |    | 47.6216      | 50.4361        |
| 8    | 12.060 | 10713716 | 79.3120 | T  | 48.2449      | 45.6145        |
| 9    | 12.960 | 76009    | 0.3424  |    | 0.3423       | 0.1969         |

9 Peaks > Area Reject 22206958 Total Area  
9 Peaks > Height Reject 173.874 Total Height

(CH-2\_18.D01) mV

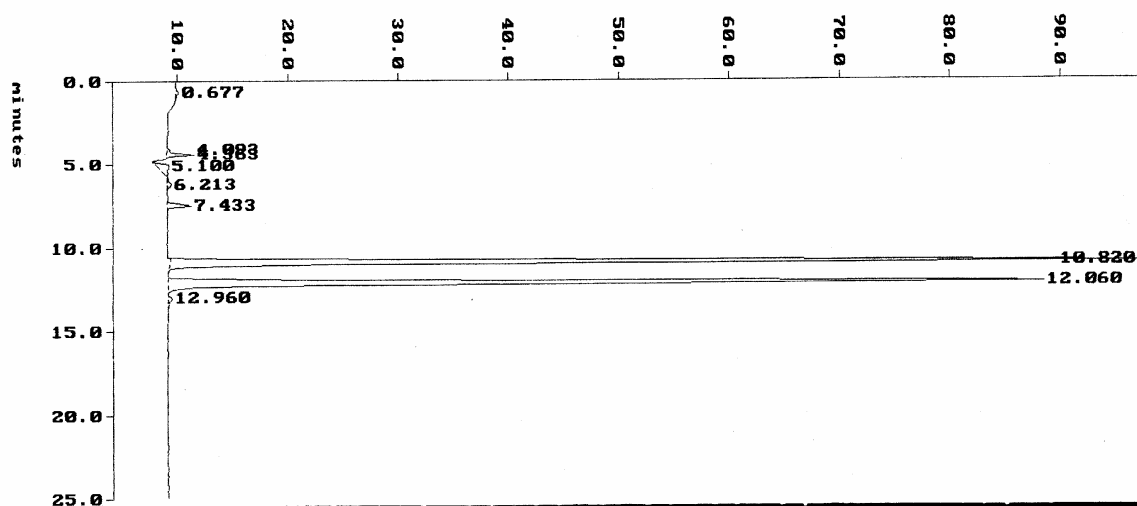

\*\*\*\*\* MODEL 1022 RUNLOG \*\*\*\*\*

Run CH-2\_\_20 abandoned at 13:33:48 Fri May 30 2003

\*\*\*\*\* MODEL 1022 RUNLOG for run: CH-2\_\_20 \*\*\*\*\*

Run terminated manually on Channel A.

File : CH-2\_\_20.D01 d-211-114  
Run : 02 Type : Sample  
Path : C:\CH-6 Inst : 1022 LC Plus  
Collection : 13:34:58 May 30 2003 Method : LCTEST [ 11:13:06 May 30 2003 ]  
Integration: 13:34:58 May 30 2003 Method : LCTEST [ 11:13:06 May 30 2003 ]  
Report : 13:51:11 May 30 2003 Method : LCTEST [ 11:13:06 May 30 2003 ]

Chirapak AD 254nm 0.7ml/min  
Hexane : i-proh = 95 : 5  
92% ee

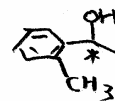

PERCENT ( AREA )

| Pk # | RT     | Area     | Height   | BC | Area Percent | Height Percent |
|------|--------|----------|----------|----|--------------|----------------|
| 1    | 4.143  | 79221    | 0.6916   | T  | 0.2734       | 0.2951         |
| 2    | 4.390  | 358888   | 2.7803   | V  | 1.2384       | 1.1864         |
| 3    | 5.137  | 305240   | 1.0726   | T  | 1.0533       | 0.4577         |
| 4    | 5.563  | 166737   | 0.6856   |    | 0.5754       | 0.2926         |
| 5    | 7.423  | 140412   | 1.7071   |    | 0.4845       | 0.7284         |
| 6    | 10.837 | 26694280 | 218.6694 |    | 92.1144      | 93.3088        |
| 7    | 12.083 | 1154797  | 8.2658   |    | 3.9849       | 3.5271         |
| 8    | 14.297 | 44039    | 0.2325   | V  | 0.1520       | 0.0992         |
| 9    | 15.523 | 35865    | 0.2454   |    | 0.1238       | 0.1047         |

9 Peaks > Area Reject 28979480 Total Area  
9 Peaks > Height Reject 234.350 Total Height

(CH-2\_\_20.D01) mU

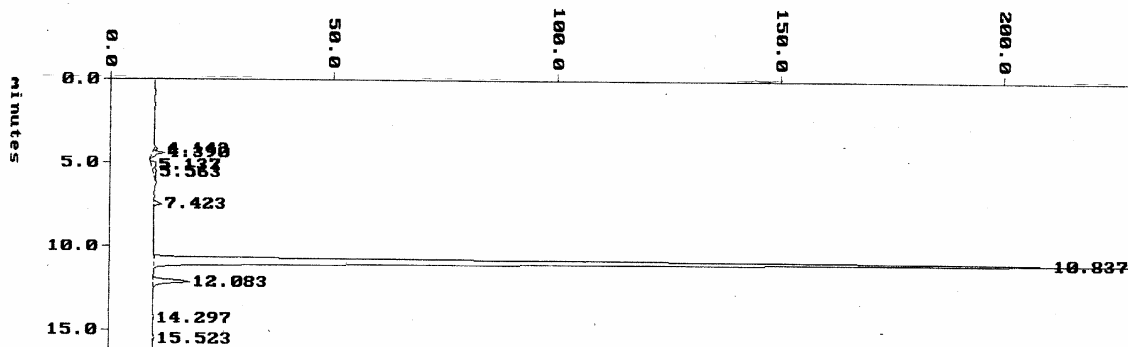

Chiralcel OJ 254nm 0.7ml/min  
Hexane : i-PrOH = 15 : 5

\*\*\*\*\* MODEL 1022 RUNLOG for run: CH-2\_\_09 \*\*\*\*\*

Run terminated manually on Channel A.

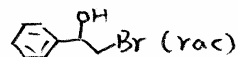

File : CH-2\_\_09.D01 d-210 1  
Run : 01 Type : Sample  
Path : C:\CH-6 Inst : 1022 LC Plus  
Collection : 13:55:52 May 29 2003 Method : LCTEST [ 08:22:43 May 29 2003 ]  
Integration: 13:55:52 May 29 2003 Method : LCTEST [ 08:22:43 May 29 2003 ]  
Report : 14:36:09 May 29 2003 Method : LCTEST [ 08:22:43 May 29 2003 ]

PERCENT ( AREA )

| PK # | RT     | Area     | Height  | BC | Area Percent | Height Percent |
|------|--------|----------|---------|----|--------------|----------------|
| 1    | 5.323  | 260983   | 1.5802  |    | 1.1595       | 3.7478         |
| 2    | 8.603  | 18749    | 0.0822  | V  | 0.0833       | 0.1948         |
| 3    | 9.463  | 409443   | 2.6021  |    | 1.8190       | 6.1715         |
| 4    | 17.903 | 24608    | 0.0786  |    | 0.1093       | 0.1865         |
| 5    | 28.477 | 10857188 | 19.8024 | V  | 48.2350      | 46.9666        |
| 6    | 31.263 | 10937976 | 18.0173 |    | 48.5939      | 42.7327        |

6 Peaks > Area Reject 22508948 Total Area  
6 Peaks > Height Reject 42.163 Total Height

(CH-2\_\_09.D01) mU

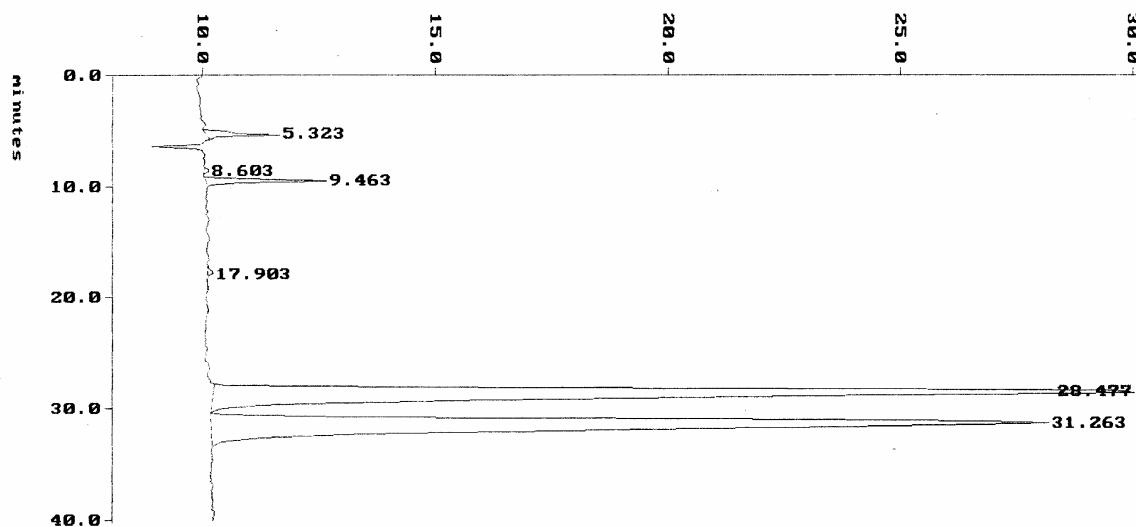

Chiracel OJ 254nm 0.7mL/min

\*\*\*\*\* MODEL 1022 RUNLOG for run: CH-2\_\_10 \*\*\*\*\*  
Run terminated manually on Channel A.

Hexane : i-PrOH = 95 : 5

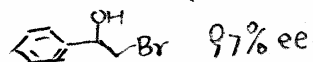

File : CH-2\_\_10.D01 d-210-112 1  
Run : 01 Type : Sample  
Path : C:\CH-6 Inst : 1022 LC Plus  
Collection : 14:41:00 May 29 2003 Method : LCTEST [ 08:22:43 May 29 2003 ]  
Integration: 14:41:00 May 29 2003 Method : LCTEST [ 08:22:43 May 29 2003 ]  
Report : 15:22:19 May 29 2003 Method : LCTEST [ 08:22:43 May 29 2003 ]

PERCENT ( AREA )

| Pk # | RT     | Area     | Height  | BC | Area Percent | Height Percent |
|------|--------|----------|---------|----|--------------|----------------|
| 1    | 5.067  | 328918   | 2.5551  | T  | 0.5329       | 2.9726         |
| 2    | 5.293  | 610607   | 3.5451  |    | 0.9893       | 4.1243         |
| 3    | 9.460  | 60330    | 0.2867  |    | 0.0977       | 0.3336         |
| 4    | 14.613 | 37003    | 0.1554  |    | 0.0600       | 0.1808         |
| 5    | 16.187 | 336490   | 1.3539  |    | 0.5452       | 1.5751         |
| 6    | 17.627 | 652619   | 2.2785  |    | 1.0574       | 2.6508         |
| 7    | 21.147 | 109065   | 0.2430  |    | 0.1767       | 0.2827         |
| 8    | 28.360 | 750894   | 1.7828  |    | 1.2166       | 2.0740         |
| 9    | 30.360 | 57169968 | 71.4255 | T  | 92.6256      | 83.0958        |
| 10   | 34.280 | 1665682  | 2.3295  |    | 2.6987       | 2.7102         |

10 Peaks > Area Reject 61721576 Total Area  
10 Peaks > Height Reject 85.956 Total Height

(CH-2\_\_10.D01) UV

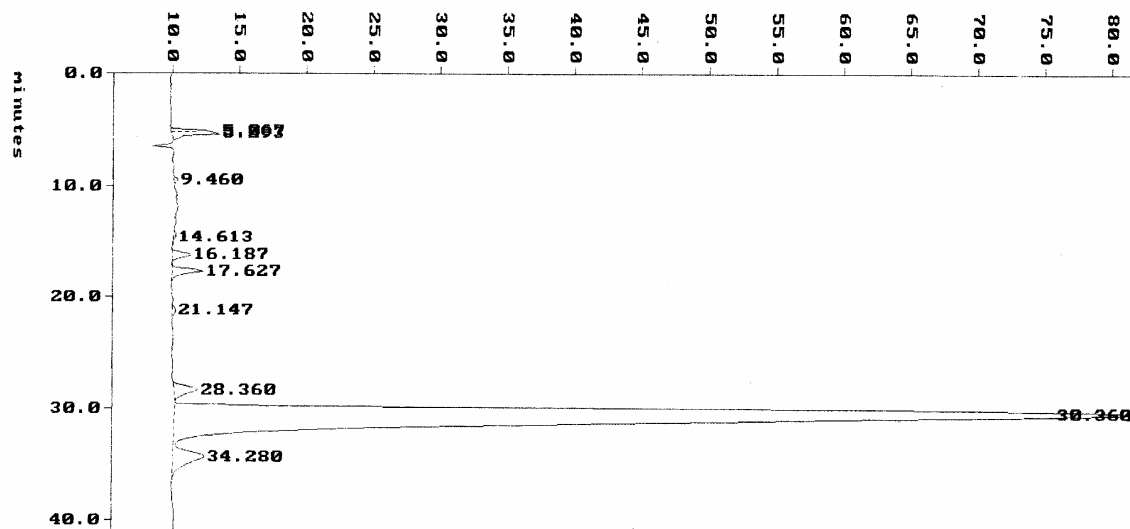

Chiralpak AD Hexane : i-proH = 95 : 5

0.7 mL/min 254 nm

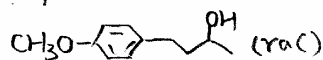

File : CH-2\_21.D01 d-212rac Type : Sample  
Run : 01 Inst : 1022 LC Plus  
Path : C:\CH-6  
Collection : 13:57:36 May 30 2003 Method : LCTEST [ 11:13:06 May 30 2003 ]  
Integration : 14:43:10 May 30 2003 Method : LCTEST [ 14:42:39 May 30 2003 ]  
Report : 14:43:12 May 30 2003 Method : LCTEST [ 14:42:39 May 30 2003 ]

PERCENT ( AREA )

| PK # | RT     | Area    | Height  | BC | Area Percent | Height Percent |
|------|--------|---------|---------|----|--------------|----------------|
| 1    | 4.383  | 190048  | 1.5612  | V  | 0.9721       | 1.4396         |
| 2    | 15.930 | 9673524 | 55.2446 | T  | 49.4813      | 50.9401        |
| 3    | 16.850 | 9686280 | 51.6442 |    | 49.5466      | 47.6203        |

3 Peaks > Area Reject 19549852 Total Area  
3 Peaks > Height Reject 108.450 Total Height

(CH-2\_21.D01) AU

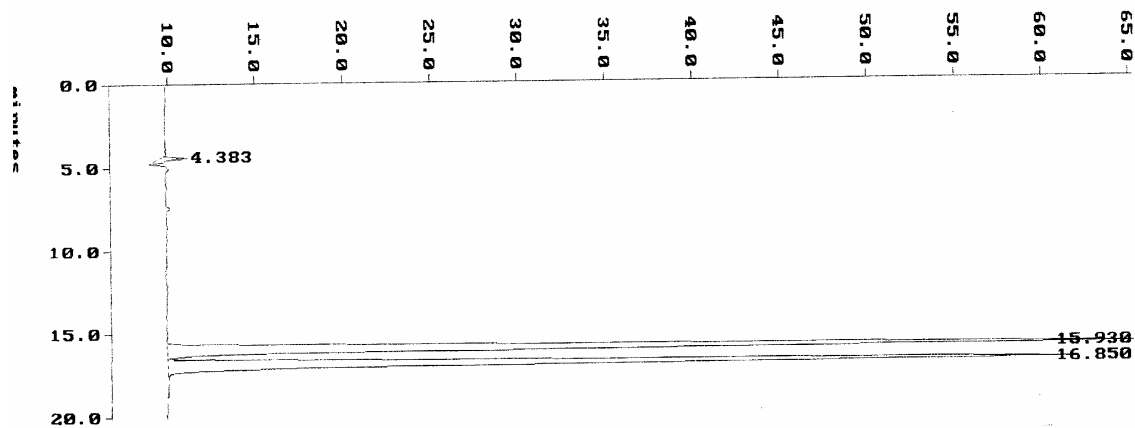





Software Version: 4.1<2F12>

Date: 03-6-12 14:18

Sample Name : d-215-rac

Data File : D:\TC4\DATA\CAO\CAP\_0190.RAW Date: 03-6-12 13:59

Sequence File: D:\TC4\DATA\CAO\CAP.SEQ Cycle: 1 Channel : A

Instrument : 970A\_-0 Rack/Vial: 0/0 Operator: cao

Sample Amount : 1.0000

(rac)

chiracel OJ 254nm 0.7ml/min

Hexane : i-proH = 95 : 5

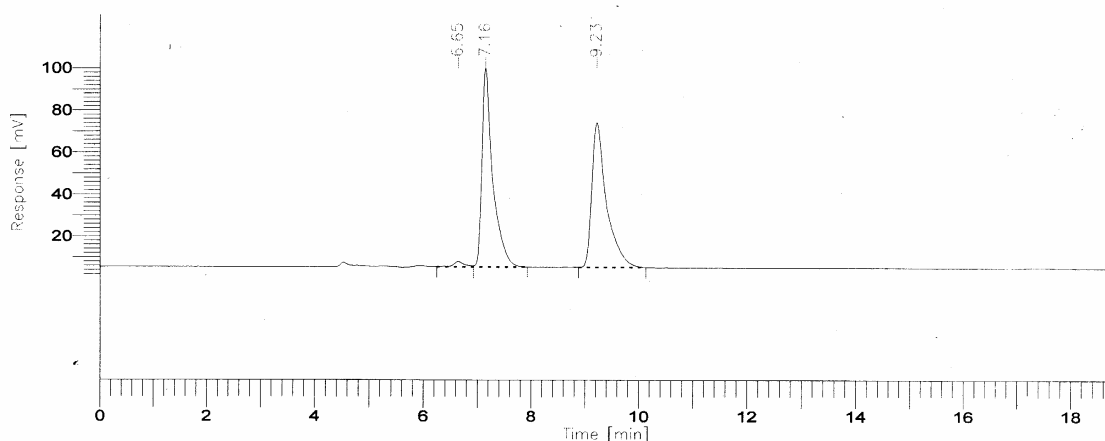

### REPORT

| Peak # | Time [min] | Area [uV*sec] | Height [uV] | Area [%] | Norm. Area [%] | BL | Area/Height [sec] |
|--------|------------|---------------|-------------|----------|----------------|----|-------------------|
| 1      | 6.647      | 33597.56      | 2462.34     | 1.26     | 0.00           | BV | 13.6446           |
| 2      | 7.155      | 1323046.94    | 94662.19    | 49.59    | 0.00           | VB | 13.9765           |
| 3      | 9.228      | 1311405.00    | 68995.95    | 49.15    | 0.00           | BB | 19.0070           |
|        |            | 2668049.50    | 166120.48   | 100.00   | 0.00           |    |                   |

Software Version: 4.1<2F12>  
 Date: 03-6-12 14:42  
 Sample Name : d-215-117  
 Data File : D:\TC4\DATA\CAO\CAP\_019P.RAW Date: 03-6-12 14:23  
 Sequence File: D:\TC4\DATA\CAO\CAP.SEQ Cycle: 1 Channel : A  
 Instrument : 970A\_0 Rack/Vial: 0/0 Operator: cao  
 Sample Amount : 1.0000 Dilution Factor : 1.00

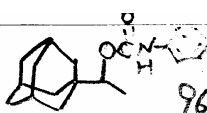

Chiralcel OJ 254nm 0.7ml/min  
 96% ee Hexane : i-ProH = 95 : 5

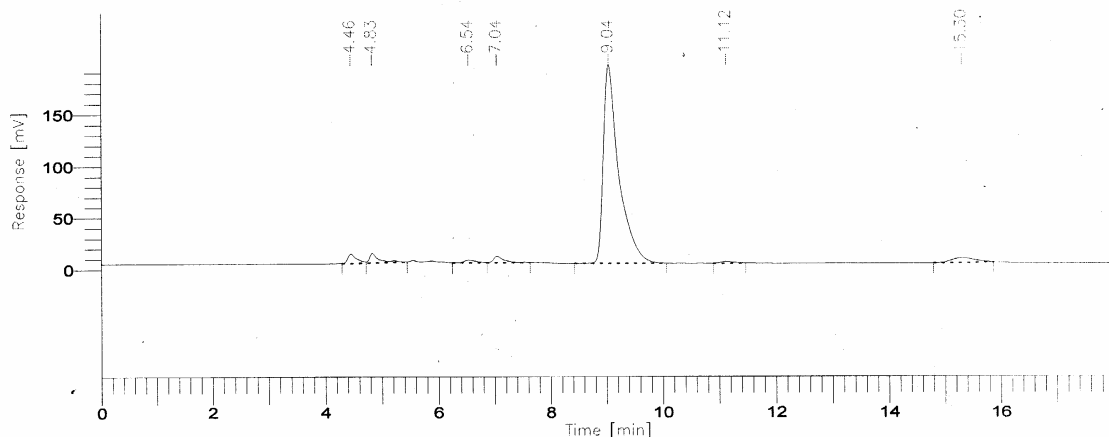

### REPORT

| Peak # | Time [min] | Area [uV*sec] | Height [uV] | Area [%] | Norm. Area [%] | Area BL | Area/Height [sec] |
|--------|------------|---------------|-------------|----------|----------------|---------|-------------------|
| 1      | 4.457      | 97593.67      | 9047.65     | 2.34     | 0.00           | BV      | 10.7866           |
| 2      | 4.833      | 103638.33     | 9190.16     | 2.49     | 0.00           | VB      | 11.2771           |
| 3      | 6.540      | 38667.60      | 2639.77     | 0.93     | 0.00           | BV      | 14.6481           |
| 4      | 7.043      | 78349.90      | 6401.38     | 1.88     | 0.00           | VB      | 12.2395           |
| 5      | 9.042      | 3687155.00    | 191309.21   | 88.46    | 0.00           | BB      | 19.2733           |
| 6      | 11.123     | 29655.00      | 1943.56     | 0.71     | 0.00           | BB      | 15.2581           |
| 7      | 15.299     | 133259.25     | 4620.73     | 3.20     | 0.00           | BB      | 28.8395           |
|        |            | 4168318.75    | 225152.44   | 100.00   | 0.00           |         |                   |

Rt- $\beta$ Dexcsst 30m x 0.25mm x 0.25 $\mu$ m

File : S22\_24.D01

110°C N<sub>2</sub> : 10 ps

D-203-107a

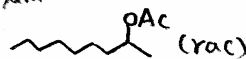

Run : 02

Collection : 10:40:00 Apr 28 2003

Method : XWD

Type : Sample  
[ 07:20:18 Apr 28 2003 ]

(S22\_24.D01) MU

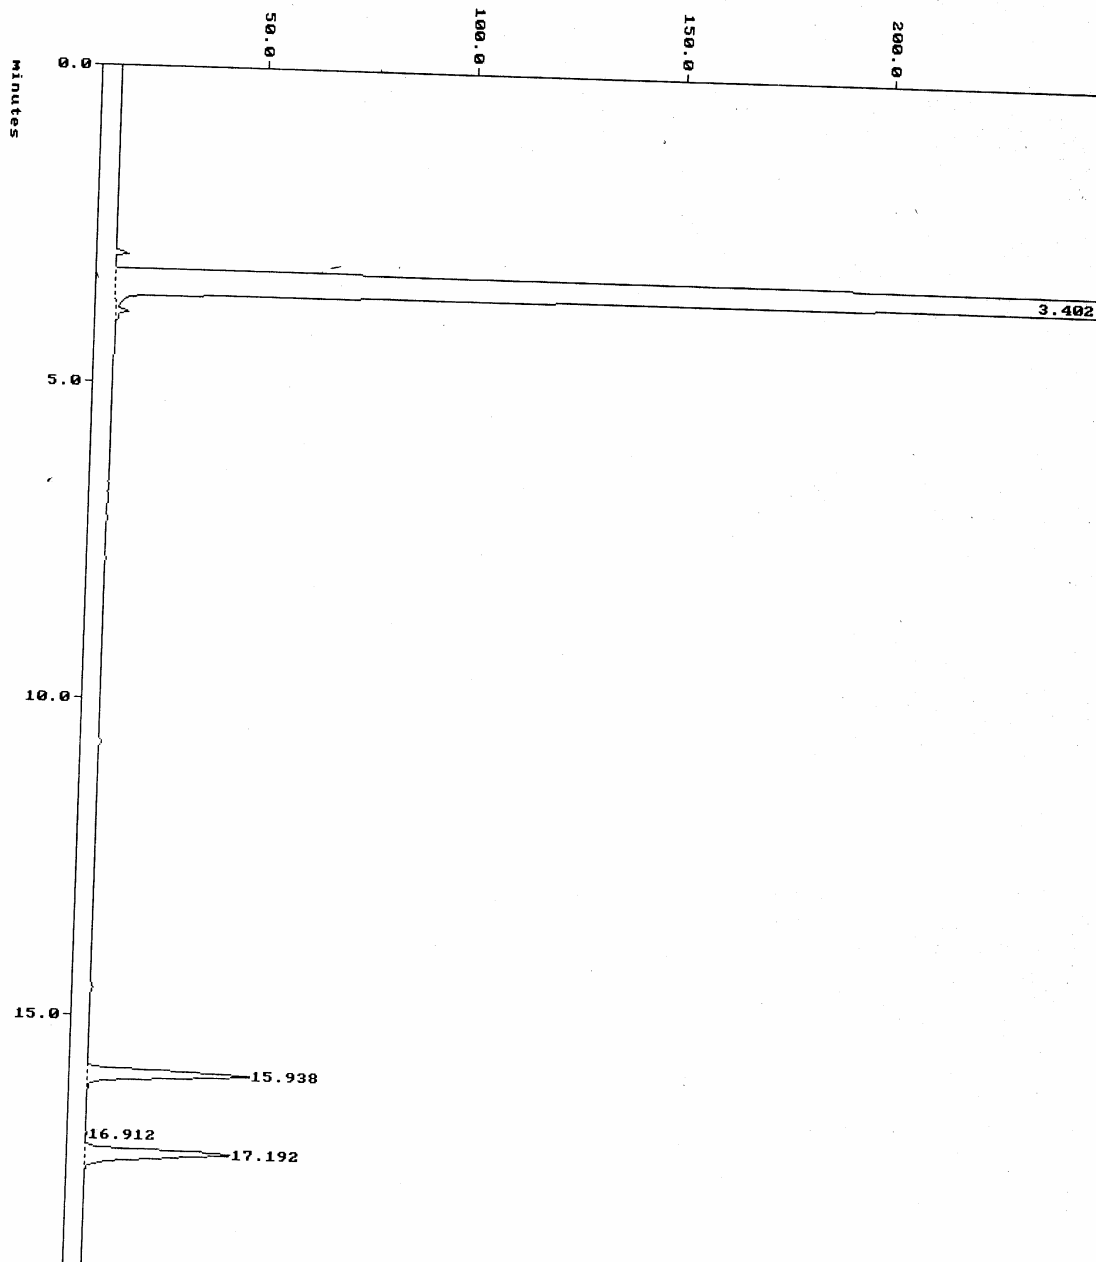

\*\*\*\*\* MODEL 1022 RUNLOG for run: S22\_\_29 \*\*\*\*\*

Run terminated manually on Channel A.

\*\*\*\*\* MODEL 1022 RUNLOG for run: S22\_\_30 \*\*\*\*\*

Run terminated manually on Channel A.

\*\*\*\*\* MODEL 1022 RUNLOG for run: S22\_\_31 \*\*\*\*\*

Run terminated manually on Channel A.

\*\*\*\*\* MODEL 1022 RUNLOG \*\*\*\*\*

Run S22\_\_32 abandoned at 09:05:41 Tue Apr 29 2003

\*\*\*\*\* MODEL 1022 RUNLOG for run: S22\_\_32 \*\*\*\*\*

Run terminated manually on Channel A.

\*\*\*\*\* MODEL 1022 RUNLOG for run: S22\_\_33 \*\*\*\*\*

Run terminated manually on Channel A.

\*\*\*\*\* MODEL 1022 RUNLOG for run: S22\_\_34 \*\*\*\*\*

Run terminated manually on Channel A.

\*\*\*\*\* MODEL 1022 RUNLOG for run: S22\_\_35 \*\*\*\*\*

Run terminated manually on Channel A.

\*\*\*\*\* MODEL 1022 RUNLOG for run: S22\_\_36 \*\*\*\*\*

Run terminated manually on Channel A.

\*\*\*\*\* MODEL 1022 RUNLOG for run: S22\_\_37 \*\*\*\*\*

Run terminated manually on Channel A.

File : S22\_\_24.D01

D-203-107a

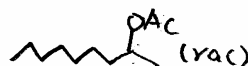

Run : 02

Type : Sampl

Path : C:\\$T\$

Inst : 1022 LC Plu

Collection : 10:40:00 Apr 28 2003 Method : XWD [ 07:20:18 Apr 28 2003 ]

Integration: 10:40:00 Apr 28 2003 Method : XWD [ 07:20:18 Apr 28 2003 ]

Report : 13:11:51 Apr 29 2003 Method : XWD [ 07:36:59 Apr 29 2003 ]

PERCENT ( AREA ) \ MANUALLY ALTERED

| Pk # | RT     | Area      | Height   | BC | Area Percent | Height Percent |
|------|--------|-----------|----------|----|--------------|----------------|
| 1    | 3.402  | 150159344 | 995.1762 |    | 96.2104      | 93.1150        |
| 2    | 15.938 | 2945611   | 38.8359  | T  | 1.8873       | 3.6337         |
| 3    | 16.912 | 24902     | 0.2981   | T  | 0.0160       | 0.0279         |
| 4    | 17.192 | 2944042   | 34.4503  |    | 1.8863       | 3.2234         |

4 Peaks > Area Reject 156073904 Total Area

4 Peaks > Height Reject 1068.760 Total Height

Rt- $\beta$ Dex<sub>cs</sub>t 30m x 0.25mm x 0.25 $\mu$ m

110°C N<sub>2</sub>: 10psi

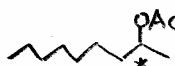

67% ee

File : S22\_35.D01

D-203-105

Run : 01

Type : Sample

Collection : 11:10:46 Apr 29 2003 Method : XWD

[ 07:36:59 Apr 29 2003 ]

(S22\_35.D01) MU

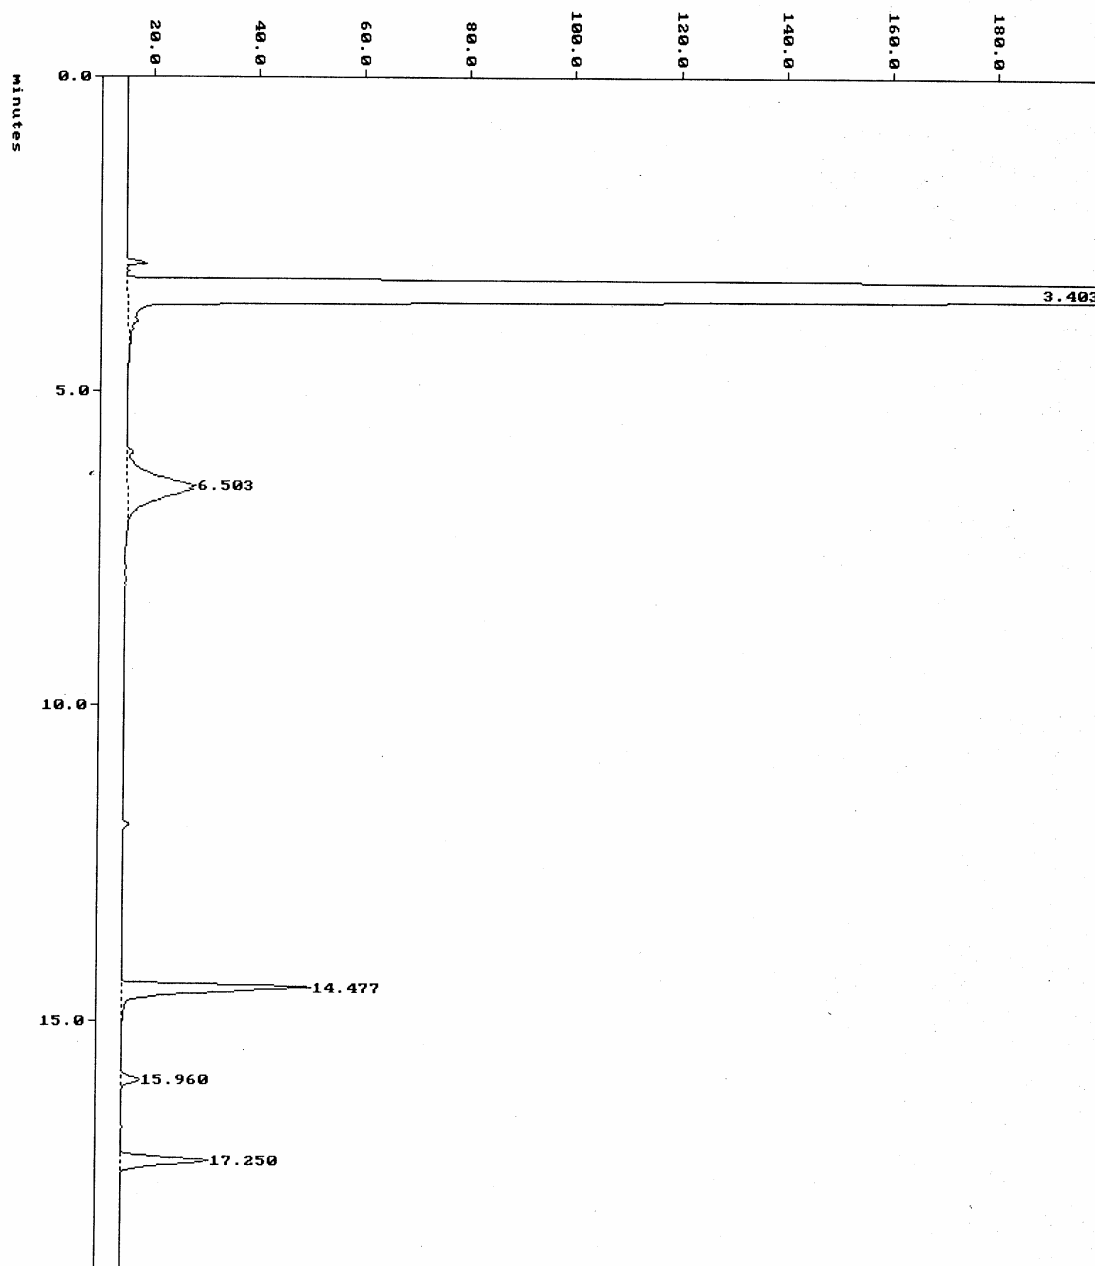

File : S22\_\_35.D01

D-203-105

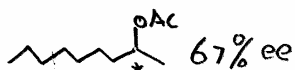

Run : 01

Type : Sampl

Path : C:\\$T\$

Inst : 1022 LC Plu

Collection : 11:10:46 Apr 29 2003 Method : XWD

[ 07:36:59 Apr 29 2003 ]

Integration: 11:10:46 Apr 29 2003 Method : XWD

[ 07:36:59 Apr 29 2003 ]

Report : 13:14:09 Apr 29 2003 Method : XWD

[ 07:36:59 Apr 29 2003 ]

PERCENT ( AREA ) \ MANUALLY ALTERED

| Pk # | RT     | Area      | Height   | BC | Area Percent | Height Percent |
|------|--------|-----------|----------|----|--------------|----------------|
| 1    | 3.403  | 165268704 | 995.0167 |    | 95.5927      | 93.5084        |
| 2    | 6.503  | 3113643   | 13.0103  |    | 1.8010       | 1.2227         |
| 3    | 14.477 | 2874628   | 35.9979  |    | 1.6627       | 3.3830         |
| 4    | 15.960 | 265290    | 3.5533   |    | 0.1534       | 0.3339         |
| 5    | 17.250 | 1366159   | 16.5157  |    | 0.7902       | 1.5521         |

5 Peaks > Area Reject 172888416 Total Area  
5 Peaks > Height Reject 1064.094 Total Height
